# Supplementary material
Source: publisher site journal article supplement (https://www.spandidos-publications.com/2965/downloadSupplementary)
Supplement: Supplementary file 1 [file downloadSupplementary]

## Sheet: Shared DEGs in different times
The list of shared DEGs in CVSMCs
Gene symbol	Expression
RGCC	Up-regulated
MGP	Up-regulated
FKBP5	Up-regulated
INMT	Up-regulated
CRYAB	Up-regulated
CD34	Up-regulated
TSC22D3	Up-regulated
PDGFD	Up-regulated
LMCD1	Up-regulated
MAOA	Up-regulated
APOD	Up-regulated
COL8A1	Up-regulated
TMEM119	Up-regulated
SVEP1	Up-regulated
FBXO32	Up-regulated
CD14	Up-regulated
SUSD2	Up-regulated
ADM	Up-regulated
ACTA2	Up-regulated
C10orf10	Up-regulated
DDIT4	Up-regulated
ANKRD1	Up-regulated
RAB11FIP1	Up-regulated
PROS1	Up-regulated
PDGFRB	Up-regulated
CTHRC1	Up-regulated
DUSP23	Up-regulated
RPS29	Up-regulated
PGM1	Up-regulated
HIST1H2BK	Up-regulated
C1orf198	Up-regulated
EPAS1	Up-regulated
ADARB1	Up-regulated
S100A4	Up-regulated
RPS6KA2	Up-regulated
GAS1	Up-regulated
FBLN5	Up-regulated
LUM	Up-regulated
CITED2	Up-regulated
PPP1R14A	Up-regulated
ADH1A	Up-regulated
ERRFI1	Up-regulated
MYL9	Up-regulated
FOXO1	Up-regulated
OXTR	Up-regulated
TCEAL4	Up-regulated
WISP1	Up-regulated
MT1X	Up-regulated
TXNIP	Up-regulated
PDE1A	Up-regulated
GAS6	Up-regulated
HPS5	Up-regulated
OLFML3	Up-regulated
PALLD	Up-regulated
LMO3	Up-regulated
COL4A1	Up-regulated
IRS2	Up-regulated
FHL1	Up-regulated
ADRA1B	Up-regulated
SEC14L1	Up-regulated
CROT	Up-regulated
RARRES3	Up-regulated
CRISPLD2	Up-regulated
COX7A1	Up-regulated
LAMA2	Up-regulated
GLS	Up-regulated
CBS	Up-regulated
PLCXD3	Up-regulated
MXD4	Up-regulated
ALPK2	Up-regulated
RASL11B	Up-regulated
TCEAL3	Up-regulated
MID1	Up-regulated
OPTN	Up-regulated
NEO1	Up-regulated
SRPX2	Up-regulated
C1QTNF5	Up-regulated
GCNT1	Up-regulated
CLIC3	Up-regulated
IFI44L	Up-regulated
ALCAM	Up-regulated
SLC40A1	Up-regulated
RAMP1	Up-regulated
PTN	Up-regulated
MT1M	Up-regulated
FBLN1	Up-regulated
METTL7A	Up-regulated
KRT7	Up-regulated
TAGLN	Up-regulated
DCN	Up-regulated
AOX1	Up-regulated
ASS1	Up-regulated
GSTM2	Up-regulated
NUPR1	Up-regulated
FNDC1	Up-regulated
HACD1	Up-regulated
HSD11B1	Up-regulated
THBS1	Up-regulated
ECM2	Up-regulated
PRUNE2	Up-regulated
SNAI2	Up-regulated
DDAH1	Up-regulated
DEPTOR	Up-regulated
PTGDS	Up-regulated
ZNF106	Up-regulated
MMP23B	Up-regulated
SH3BGRL	Up-regulated
SEPTIN11	Up-regulated
GLRX	Up-regulated
VGLL3	Up-regulated
NPTX2	Up-regulated
TEX2	Up-regulated
FSTL3	Up-regulated
STAT2	Up-regulated
ZBTB16	Up-regulated
DKK3	Up-regulated
ARHGDIB	Up-regulated
QPRT	Up-regulated
CEBPB	Up-regulated
IFITM3	Up-regulated
MGST1	Up-regulated
GPNMB	Up-regulated
PLIN2	Up-regulated
BEX1	Up-regulated
GSN	Up-regulated
PPIC	Up-regulated
HSPB2	Up-regulated
HSPB6	Up-regulated
MGARP	Up-regulated
MTSS1	Up-regulated
PRSS23	Up-regulated
ELL2	Up-regulated
CYBRD1	Up-regulated
GSTT1	Up-regulated
AKR1C3	Up-regulated
CFH	Up-regulated
CTSK	Up-regulated
SORT1	Up-regulated
GCHFR	Up-regulated
PLSCR4	Up-regulated
HEBP1	Up-regulated
LIMS2	Up-regulated
SGCG	Up-regulated
CXCL8	Down-regulated
DIRAS3	Down-regulated
CCL2	Down-regulated
MMP1	Down-regulated
IL1B	Down-regulated
SOST	Down-regulated
PLAU	Down-regulated
ALDH1A3	Down-regulated
ANXA10	Down-regulated
LPXN	Down-regulated
CXCL1	Down-regulated
PTTG1	Down-regulated
CDH6	Down-regulated
HIST1H4C	Down-regulated
PTTG3P	Down-regulated
APCDD1L	Down-regulated
CD55	Down-regulated
KIAA0101	Down-regulated
CDC20	Down-regulated
FST	Down-regulated
MCM7	Down-regulated
UBE2C	Down-regulated
TM4SF1	Down-regulated
DDX10	Down-regulated
GINS2	Down-regulated
CCNA2	Down-regulated
PAPPA	Down-regulated
TUBB3	Down-regulated
NUSAP1	Down-regulated
ODC1	Down-regulated
CCNB2	Down-regulated
BDKRB1	Down-regulated
PRC1	Down-regulated
PHLDA1	Down-regulated
PRSS3	Down-regulated
CXCL6	Down-regulated
TOP2A	Down-regulated
KIF20A	Down-regulated
UHRF1	Down-regulated
NCAPG	Down-regulated
CEP55	Down-regulated
NTM	Down-regulated
CKAP2L	Down-regulated
PODXL	Down-regulated
PBK	Down-regulated
SLC7A1	Down-regulated
CYP1B1	Down-regulated
CDKN3	Down-regulated
CENPM	Down-regulated
PDE7B	Down-regulated
MAD2L1	Down-regulated
DNAJC9	Down-regulated
BMP2	Down-regulated
TFPI2	Down-regulated
FEN1	Down-regulated
ANLN	Down-regulated
KIF11	Down-regulated
ADGRG1	Down-regulated
GALNT12	Down-regulated
AURKA	Down-regulated
NPTX1	Down-regulated
HMGN2	Down-regulated
CENPF	Down-regulated
COL13A1	Down-regulated
CDC45	Down-regulated
HJURP	Down-regulated
TRIP13	Down-regulated
E2F7	Down-regulated
TYMS	Down-regulated
COL22A1	Down-regulated
HMGB2	Down-regulated
FBXO5	Down-regulated
NRIP3	Down-regulated
TK1	Down-regulated
RRM1	Down-regulated
BIRC5	Down-regulated
UBE2T	Down-regulated
IL33	Down-regulated
STMN1	Down-regulated
NCEH1	Down-regulated
CYP2S1	Down-regulated
PRRX2	Down-regulated
IL13RA2	Down-regulated
SPC24	Down-regulated
CDCA5	Down-regulated
CDK1	Down-regulated
FAM64A	Down-regulated
NEK2	Down-regulated
CKS1B	Down-regulated
RACGAP1	Down-regulated
KIF23	Down-regulated
BUB1	Down-regulated
ID2	Down-regulated
CDCA3	Down-regulated
EXOSC9	Down-regulated
GK	Down-regulated
HS3ST3A1	Down-regulated
DCBLD2	Down-regulated
ASPM	Down-regulated
GABBR2	Down-regulated
HEY2	Down-regulated
AURKB	Down-regulated
HMGA1	Down-regulated
TRMT5	Down-regulated
TGFBI	Down-regulated
RAD51AP1	Down-regulated
MCM3	Down-regulated
MCM10	Down-regulated
CIRBP	Down-regulated
SLC14A1	Down-regulated
CD44	Down-regulated
NUDT1	Down-regulated
PPP1R15A	Down-regulated
CENPN	Down-regulated
PFKP	Down-regulated
NT5E	Down-regulated
MCM5	Down-regulated
PCNA	Down-regulated
DLGAP5	Down-regulated
MELK	Down-regulated
SH3KBP1	Down-regulated
H2AFZ	Down-regulated
CDCA4	Down-regulated
LMO2	Down-regulated
CDCA8	Down-regulated
PLEK2	Down-regulated
ZWINT	Down-regulated
PLK4	Down-regulated
HMMR	Down-regulated
GRB14	Down-regulated
POC1A	Down-regulated
LMNB2	Down-regulated
TPX2	Down-regulated
KIF2C	Down-regulated
MCM2	Down-regulated
DEPDC1	Down-regulated
BTG3	Down-regulated
SPC25	Down-regulated
CREB3L2	Down-regulated
TTK	Down-regulated
CDCP1	Down-regulated
CSTF3	Down-regulated
STIL	Down-regulated
FOSL1	Down-regulated
SEMA3A	Down-regulated
SMS	Down-regulated
NDUFA4L2	Down-regulated
FOXM1	Down-regulated
RFC4	Down-regulated
SKA1	Down-regulated
NKD2	Down-regulated
LRIG1	Down-regulated
ECT2	Down-regulated
OIP5	Down-regulated
KPNA2	Down-regulated
CCNF	Down-regulated
FOXD1	Down-regulated
PAQR4	Down-regulated
CCNB1	Down-regulated
CHSY1	Down-regulated
CENPK	Down-regulated
BDNF	Down-regulated
PRDM8	Down-regulated
MCM6	Down-regulated
SLC7A11	Down-regulated
IGFBP5	Down-regulated
TACC3	Down-regulated
ITGA2	Down-regulated
KIF20B	Down-regulated
LXN	Down-regulated
CKAP2	Down-regulated
CDCA7	Down-regulated
MMP16	Down-regulated
RNASEH2A	Down-regulated
NDC80	Down-regulated

## Sheet: Shared DEGS expression
The list of DEGs in CVSMCs from different times
2VS0	Gene.symbol	Gene name	logFC	adj.P.Val		8VS0	Gene.symbol	Gene name	logFC	adj.P.Val		12VS0	Gene.symbol	Gene name	logFC	adj.P.Val		25VS0	Gene.symbol	Gene name	logFC	adj.P.Val
	ACTA2	actin, alpha 2, smooth muscle, aorta	2.24	1.18e-06			ACTA2	actin, alpha 2, smooth muscle, aorta	2.97	5.69e-07			ACTA2	actin, alpha 2, smooth muscle, aorta	2.68	2.8e-07			ACTA2	actin, alpha 2, smooth muscle, aorta	3.13327	1.78e-07
	ADARB1	adenosine deaminase, RNA specific B1	1.81	4.54e-07			ADARB1	adenosine deaminase, RNA specific B1	1.72	3.03e-06			ADARB1	adenosine deaminase, RNA specific B1	1.83	6.69e-08			ADARB1	adenosine deaminase, RNA specific B1	1.78575	3.12e-05
	ADGRG1	adhesion G protein-coupled receptor G1	-1.59	2.95e-07			ADGRG1	adhesion G protein-coupled receptor G1	-1.65	5.99e-07			ADGRG1	adhesion G protein-coupled receptor G1	-1.74	1.04e-07			ADGRG1	adhesion G protein-coupled receptor G1	-1.76428	1.38e-07
	ADH1A	alcohol dehydrogenase 1A (class I), alpha polypeptide	1.76	4.88e-07			ADH1A	alcohol dehydrogenase 1A (class I), alpha polypeptide	2.89	4.21e-07			ADH1A	alcohol dehydrogenase 1A (class I), alpha polypeptide	3.42	9.73e-09			ADH1A	alcohol dehydrogenase 1A (class I), alpha polypeptide	3.7308	6.64e-08
	ADM	adrenomedullin	2.26	6.11e-07			ADM	adrenomedullin	1.86	1.17e-06			ADM	adrenomedullin	1.98	5.8e-07			ADM	adrenomedullin	2.02152	5.07e-07
	ADRA1B	adrenoceptor alpha 1B	1.57	5.31e-06			ADRA1B	adrenoceptor alpha 1B	1.52	1.34e-05			ADRA1B	adrenoceptor alpha 1B	1.64	3.56e-06			ADRA1B	adrenoceptor alpha 1B	1.4728	7.99e-06
	AKR1C3	aldo-keto reductase family 1, member C3	1.04	3.36e-06			AKR1C3	aldo-keto reductase family 1, member C3	1.62	1.48e-07			AKR1C3	aldo-keto reductase family 1, member C3	1.94	6.66e-08			AKR1C3	aldo-keto reductase family 1, member C3	1.76852	5.53e-06
	ALCAM	activated leukocyte cell adhesion molecule	1.37	0.00197			ALCAM	activated leukocyte cell adhesion molecule	1.4	0.00146			ALCAM	activated leukocyte cell adhesion molecule	1.46	0.00121			ALCAM	activated leukocyte cell adhesion molecule	1.87153	0.000893
	ALDH1A3	aldehyde dehydrogenase 1 family member A3	-3.22	6.13e-08			ALDH1A3	aldehyde dehydrogenase 1 family member A3	-3.46	1.11e-07			ALDH1A3	aldehyde dehydrogenase 1 family member A3	-3.87	1.13e-08			ALDH1A3	aldehyde dehydrogenase 1 family member A3	-3.96671	2.46e-08
	ALPK2	alpha kinase 2	1.47	3.35e-06			ALPK2	alpha kinase 2	2.07	6.64e-07			ALPK2	alpha kinase 2	2.41	6.66e-08			ALPK2	alpha kinase 2	2.02667	1.68e-06
	ANKRD1	ankyrin repeat domain 1	2.17	0.00041			ANKRD1	ankyrin repeat domain 1	2.01	0.000121			ANKRD1	ankyrin repeat domain 1	2.17	3.26e-06			ANKRD1	ankyrin repeat domain 1	2.4343	1.45e-06
	ANLN	anillin actin binding protein	-1.6	8.65e-06			ANLN	anillin actin binding protein	-2.07	1.58e-06			ANLN	anillin actin binding protein	-2.32	3.93e-07			ANLN	anillin actin binding protein	-1.9428	2.54e-06
	ANXA10	annexin A10	-2.94	3.49e-07			ANXA10	annexin A10	-4.13	1.38e-07			ANXA10	annexin A10	-4.84	5.79e-09			ANXA10	annexin A10	-4.22698	1.01e-06
	AOX1	aldehyde oxidase 1	1.31	1.27e-05			AOX1	aldehyde oxidase 1	1.94	5.04e-06			AOX1	aldehyde oxidase 1	1.83	4.61e-08			AOX1	aldehyde oxidase 1	2.22538	3.94e-06
	APCDD1L	APC down-regulated 1 like	-2.1	1.32e-05			APCDD1L	APC down-regulated 1 like	-2.16	3.72e-06			APCDD1L	APC down-regulated 1 like	-2.52	2.47e-07			APCDD1L	APC down-regulated 1 like	-1.72986	1.56e-05
	APOD	apolipoprotein D	2.54	5.43e-08			APOD	apolipoprotein D	4.62	6.08e-09			APOD	apolipoprotein D	4.7	1.13e-07			APOD	apolipoprotein D	4.92084	7.62e-08
	ARHGDIB	Rho GDP dissociation inhibitor beta	1.13	9.77e-05			ARHGDIB	Rho GDP dissociation inhibitor beta	1.16	2.95e-05			ARHGDIB	Rho GDP dissociation inhibitor beta	1.21	3.95e-06			ARHGDIB	Rho GDP dissociation inhibitor beta	1.30408	0.000431
	ASPM	abnormal spindle microtubule assembly	-1.36	4.48e-06			ASPM	abnormal spindle microtubule assembly	-1.96	6.26e-07			ASPM	abnormal spindle microtubule assembly	-2.27	4.81e-08			ASPM	abnormal spindle microtubule assembly	-2.07672	3.85e-07
	ASS1	argininosuccinate synthase 1	1.29	6.22e-07			ASS1	argininosuccinate synthase 1	1.36	7.31e-07			ASS1	argininosuccinate synthase 1	1.89	2.96e-08			ASS1	argininosuccinate synthase 1	1.37384	2.5e-06
	AURKA	aurora kinase A	-1.59	1.21e-05			AURKA	aurora kinase A	-2.27	2.5e-07			AURKA	aurora kinase A	-2.61	1.71e-07			AURKA	aurora kinase A	-2.21093	6.72e-07
	AURKB	aurora kinase B	-1.35	4.77e-06			AURKB	aurora kinase B	-1.87	1.25e-06			AURKB	aurora kinase B	-1.96	2.11e-07			AURKB	aurora kinase B	-1.86782	7.69e-07
	BDKRB1	bradykinin receptor B1	-1.83	2.42e-06			BDKRB1	bradykinin receptor B1	-1.86	1.94e-06			BDKRB1	bradykinin receptor B1	-1.94	1.65e-06			BDKRB1	bradykinin receptor B1	-2.04731	1.29e-06
	BDNF	brain derived neurotrophic factor	-1.07	0.000178			BDNF	brain derived neurotrophic factor	-1.21	7.84e-05			BDNF	brain derived neurotrophic factor	-1.41	3.31e-05			BDNF	brain derived neurotrophic factor	-1.34457	3.83e-05
	BEX1	brain expressed X-linked 1	1.1	1.21e-05			BEX1	brain expressed X-linked 1	2.84	1.15e-07			BEX1	brain expressed X-linked 1	3.53	5.79e-09			BEX1	brain expressed X-linked 1	2.90658	3.06e-07
	BIRC5	baculoviral IAP repeat containing 5	-1.47	1e-05			BIRC5	baculoviral IAP repeat containing 5	-2.18	1.06e-06			BIRC5	baculoviral IAP repeat containing 5	-2.54	1.32e-07			BIRC5	baculoviral IAP repeat containing 5	-2.00205	1.21e-05
	BMP2	bone morphogenetic protein 2	-1.61	3.76e-05			BMP2	bone morphogenetic protein 2	-2.14	6.17e-06			BMP2	bone morphogenetic protein 2	-2.22	2.47e-06			BMP2	bone morphogenetic protein 2	-2.195	5.41e-06
	BTG3	BTG anti-proliferation factor 3	-1.16	0.000194			BTG3	BTG anti-proliferation factor 3	-1.11	0.000189			BTG3	BTG anti-proliferation factor 3	-1.18	6.87e-05			BTG3	BTG anti-proliferation factor 3	-1.5533	2.48e-05
	BUB1	BUB1 mitotic checkpoint serine/threonine kinase	-1.38	1.18e-05			BUB1	BUB1 mitotic checkpoint serine/threonine kinase	-1.68	4.12e-06			BUB1	BUB1 mitotic checkpoint serine/threonine kinase	-1.98	4.06e-07			BUB1	BUB1 mitotic checkpoint serine/threonine kinase	-1.86445	1.37e-06
	C10orf10	chromosome 10 open reading frame 10	2.2	8.27e-07			C10orf10	chromosome 10 open reading frame 10	2.87	6.78e-07			C10orf10	chromosome 10 open reading frame 10	3.14	4.95e-08			C10orf10	chromosome 10 open reading frame 10	2.99164	1.19e-07
	C1orf198	chromosome 1 open reading frame 198	1.84	4.44e-06			C1orf198	chromosome 1 open reading frame 198	2.25	1.38e-06			C1orf198	chromosome 1 open reading frame 198	2.61	3.28e-07			C1orf198	chromosome 1 open reading frame 198	1.84656	1.42e-05
	C1QTNF5	C1q and tumor necrosis factor related protein 5	1.42	1.69e-06			C1QTNF5	C1q and tumor necrosis factor related protein 5	2.58	2.42e-06			C1QTNF5	C1q and tumor necrosis factor related protein 5	2.91	1.46e-08			C1QTNF5	C1q and tumor necrosis factor related protein 5	2.34534	8.61e-08
	CBS	cystathionine-beta-synthase	1.5	1.48e-06			CBS	cystathionine-beta-synthase	1.39	1.32e-06			CBS	cystathionine-beta-synthase	1.37	1.31e-05			CBS	cystathionine-beta-synthase	1.96599	3.67e-07
	CCL2	C-C motif chemokine ligand 2	-3.8	2.22e-07			CCL2	C-C motif chemokine ligand 2	-2.68	2.78e-06			CCL2	C-C motif chemokine ligand 2	-3.17	5.34e-08			CCL2	C-C motif chemokine ligand 2	-3.36197	1.49e-06
	CCNA2	cyclin A2	-1.92	6.58e-07			CCNA2	cyclin A2	-2.59	1.38e-07			CCNA2	cyclin A2	-2.79	2.96e-08			CCNA2	cyclin A2	-2.54476	1.38e-07
	CCNB1	cyclin B1	-1.08	0.00179			CCNB1	cyclin B1	-1.46	0.000178			CCNB1	cyclin B1	-1.57	6.95e-05			CCNB1	cyclin B1	-1.32703	0.00035
	CCNB2	cyclin B2	-1.83	3.89e-07			CCNB2	cyclin B2	-2.56	1.56e-08			CCNB2	cyclin B2	-3.07	4.97e-09			CCNB2	cyclin B2	-2.31614	2.15e-06
	CCNF	cyclin F	-1.08	1.51e-05			CCNF	cyclin F	-1.65	1.78e-06			CCNF	cyclin F	-1.66	4.12e-07			CCNF	cyclin F	-1.61582	8.88e-06
	CD14	CD14 molecule	2.3	6.58e-07			CD14	CD14 molecule	2.28	1.26e-06			CD14	CD14 molecule	2.63	2.72e-07			CD14	CD14 molecule	1.93518	5.67e-06
	CD34	CD34 molecule	2.8	3.72e-08			CD34	CD34 molecule	2.46	3.8e-07			CD34	CD34 molecule	2.82	1.99e-08			CD34	CD34 molecule	3.12565	2.93e-08
	CD44	CD44 molecule (Indian blood group)	-1.31	0.000433			CD44	CD44 molecule (Indian blood group)	-1.48	0.00016			CD44	CD44 molecule (Indian blood group)	-1.84	2.15e-05			CD44	CD44 molecule (Indian blood group)	-1.70413	0.000121
	CD55	CD55 molecule (Cromer blood group)	-2.09	1.11e-05			CD55	CD55 molecule (Cromer blood group)	-1.69	2.29e-05			CD55	CD55 molecule (Cromer blood group)	-1.77	8.39e-06			CD55	CD55 molecule (Cromer blood group)	-1.76599	2.21e-05
	CDC20	cell division cycle 20	-2.01	1.05e-05			CDC20	cell division cycle 20	-3.45	2.98e-07			CDC20	cell division cycle 20	-3.95	5.37e-08			CDC20	cell division cycle 20	-3.32402	1.37e-06
	CDC45	cell division cycle 45	-1.56	1.21e-05			CDC45	cell division cycle 45	-2.36	3.98e-07			CDC45	cell division cycle 45	-2.42	1.78e-07			CDC45	cell division cycle 45	-2.30021	5.02e-07
	CDCA3	cell division cycle associated 3	-1.38	3.37e-05			CDCA3	cell division cycle associated 3	-1.96	3.26e-06			CDCA3	cell division cycle associated 3	-2.1	9.22e-07			CDCA3	cell division cycle associated 3	-1.86833	4.35e-06
	CDCA4	cell division cycle associated 4	-1.23	2e-05			CDCA4	cell division cycle associated 4	-1.55	2.69e-06			CDCA4	cell division cycle associated 4	-1.53	1.74e-06			CDCA4	cell division cycle associated 4	-1.5814	6.11e-06
	CDCA5	cell division cycle associated 5	-1.43	2.93e-06			CDCA5	cell division cycle associated 5	-2.32	2.5e-07			CDCA5	cell division cycle associated 5	-2.59	5.85e-08			CDCA5	cell division cycle associated 5	-2.28551	1.49e-06
	CDCA7	cell division cycle associated 7	-1.01	2.98e-06			CDCA7	cell division cycle associated 7	-1.15	1.13e-06			CDCA7	cell division cycle associated 7	-1.26	1.44e-06			CDCA7	cell division cycle associated 7	-1.13693	2.78e-06
	CDCA8	cell division cycle associated 8	-1.22	1.2e-05			CDCA8	cell division cycle associated 8	-1.61	1.46e-06			CDCA8	cell division cycle associated 8	-1.65	6.63e-07			CDCA8	cell division cycle associated 8	-1.52854	2.15e-06
	CDCP1	CUB domain containing protein 1	-1.14	2.95e-07			CDCP1	CUB domain containing protein 1	-1.61	5.03e-08			CDCP1	CUB domain containing protein 1	-1.7	1.21e-08			CDCP1	CUB domain containing protein 1	-1.74151	6.6e-08
	CDH6	cadherin 6	-2.23	2.73e-07			CDH6	cadherin 6	-2.96	5.03e-08			CDH6	cadherin 6	-3.06	9.73e-09			CDH6	cadherin 6	-3.04467	2.93e-08
	CDK1	cyclin dependent kinase 1	-1.43	4.03e-05			CDK1	cyclin dependent kinase 1	-2.08	2.72e-06			CDK1	cyclin dependent kinase 1	-2.25	1.04e-06			CDK1	cyclin dependent kinase 1	-1.98311	4.92e-06
	CDKN3	cyclin dependent kinase inhibitor 3	-1.67	7.76e-05			CDKN3	cyclin dependent kinase inhibitor 3	-1.78	3.43e-05			CDKN3	cyclin dependent kinase inhibitor 3	-1.99	9.53e-06			CDKN3	cyclin dependent kinase inhibitor 3	-1.80479	1.99e-05
	CEBPB	CCAAT/enhancer binding protein beta	1.12	2.05e-05			CEBPB	CCAAT/enhancer binding protein beta	1.27	4.17e-05			CEBPB	CCAAT/enhancer binding protein beta	1.3	1.1e-06			CEBPB	CCAAT/enhancer binding protein beta	1.23029	6.25e-05
	CENPF	centromere protein F	-1.57	1.36e-06			CENPF	centromere protein F	-1.95	3.62e-07			CENPF	centromere protein F	-2.17	7.6e-08			CENPF	centromere protein F	-1.83681	7.47e-07
	CENPK	centromere protein K	-1.07	0.000104			CENPK	centromere protein K	-1.26	3.94e-05			CENPK	centromere protein K	-1.35	1.49e-05			CENPK	centromere protein K	-1.30196	9.49e-05
	CENPM	centromere protein M	-1.65	2.99e-05			CENPM	centromere protein M	-2.05	3.2e-06			CENPM	centromere protein M	-2.27	1.07e-06			CENPM	centromere protein M	-2.06526	8.88e-06
	CENPN	centromere protein N	-1.29	8.27e-07			CENPN	centromere protein N	-1.39	6.34e-07			CENPN	centromere protein N	-1.44	4.59e-07			CENPN	centromere protein N	-1.21373	2.49e-05
	CEP55	centrosomal protein 55	-1.72	1.65e-06			CEP55	centrosomal protein 55	-2.43	2.56e-07			CEP55	centrosomal protein 55	-2.74	4.45e-08			CEP55	centrosomal protein 55	-2.25536	3.41e-07
	CFH	complement factor H	1.04	8.83e-06			CFH	complement factor H	2.19	5.16e-07			CFH	complement factor H	2.12	9.59e-08			CFH	complement factor H	2.35206	3.47e-08
	CHSY1	chondroitin sulfate synthase 1	-1.07	9.72e-06			CHSY1	chondroitin sulfate synthase 1	-1.55	2.43e-06			CHSY1	chondroitin sulfate synthase 1	-1.68	2.58e-07			CHSY1	chondroitin sulfate synthase 1	-1.59339	2.66e-06
	CIRBP	cold inducible RNA binding protein	-1.32	5.12e-05			CIRBP	cold inducible RNA binding protein	-1.82	1.12e-05			CIRBP	cold inducible RNA binding protein	-1.04	0.00014			CIRBP	cold inducible RNA binding protein	-1.54819	0.000473
	CITED2	Cbp/p300 interacting transactivator with Glu/Asp rich carboxy-terminal domain 2	1.78	0.000277			CITED2	Cbp/p300 interacting transactivator with Glu/Asp rich carboxy-terminal domain 2	1.48	0.000107			CITED2	Cbp/p300 interacting transactivator with Glu/Asp rich carboxy-terminal domain 2	1.58	3.27e-05			CITED2	Cbp/p300 interacting transactivator with Glu/Asp rich carboxy-terminal domain 2	1.46803	0.000452
	CKAP2	cytoskeleton associated protein 2	-1.02	6.03e-05			CKAP2	cytoskeleton associated protein 2	-1.09	1.65e-05			CKAP2	cytoskeleton associated protein 2	-1.16	1.07e-05			CKAP2	cytoskeleton associated protein 2	-1.06663	2.38e-05
	CKAP2L	cytoskeleton associated protein 2 like	-1.71	7.45e-06			CKAP2L	cytoskeleton associated protein 2 like	-2.13	1.46e-06			CKAP2L	cytoskeleton associated protein 2 like	-2.18	6.93e-07			CKAP2L	cytoskeleton associated protein 2 like	-1.99988	3.3e-06
	CKS1B	CDC28 protein kinase regulatory subunit 1B	-1.4	6.58e-07			CKS1B	CDC28 protein kinase regulatory subunit 1B	-1.64	1.06e-06			CKS1B	CDC28 protein kinase regulatory subunit 1B	-1.66	4.91e-07			CKS1B	CDC28 protein kinase regulatory subunit 1B	-1.12352	2.77e-05
	CLIC3	chloride intracellular channel 3	1.38	3.32e-05			CLIC3	chloride intracellular channel 3	2.24	1.46e-06			CLIC3	chloride intracellular channel 3	2.55	2.8e-07			CLIC3	chloride intracellular channel 3	1.9509	1.31e-06
	COL13A1	collagen type XIII alpha 1 chain	-1.56	3.72e-06			COL13A1	collagen type XIII alpha 1 chain	-2.08	3.98e-07			COL13A1	collagen type XIII alpha 1 chain	-2.63	7.19e-08			COL13A1	collagen type XIII alpha 1 chain	-2.48503	2.71e-07
	COL22A1	collagen type XXII alpha 1 chain	-1.5	8.2e-06			COL22A1	collagen type XXII alpha 1 chain	-1.71	3.02e-06			COL22A1	collagen type XXII alpha 1 chain	-1.69	1.68e-06			COL22A1	collagen type XXII alpha 1 chain	-1.79905	3.13e-06
	COL4A1	collagen type IV alpha 1 chain	1.58	2.53e-05			COL4A1	collagen type IV alpha 1 chain	2.51	1.53e-06			COL4A1	collagen type IV alpha 1 chain	2.78	9.66e-07			COL4A1	collagen type IV alpha 1 chain	2.13397	0.000337
	COL8A1	collagen type VIII alpha 1 chain	2.49	9.15e-08			COL8A1	collagen type VIII alpha 1 chain	3.26	2.19e-08			COL8A1	collagen type VIII alpha 1 chain	3.54	1.76e-08			COL8A1	collagen type VIII alpha 1 chain	3.33495	2.39e-06
	COX7A1	cytochrome c oxidase subunit 7A1	1.53	1.09e-05			COX7A1	cytochrome c oxidase subunit 7A1	2.58	7.55e-08			COX7A1	cytochrome c oxidase subunit 7A1	3.09	2.16e-07			COX7A1	cytochrome c oxidase subunit 7A1	2.96742	2.47e-07
	CREB3L2	cAMP responsive element binding protein 3 like 2	-1.15	9.75e-05			CREB3L2	cAMP responsive element binding protein 3 like 2	-1.51	0.000346			CREB3L2	cAMP responsive element binding protein 3 like 2	-1.86	3.07e-06			CREB3L2	cAMP responsive element binding protein 3 like 2	-1.6264	5.09e-05
	CRISPLD2	cysteine rich secretory protein LCCL domain containing 2	1.54	1.17e-05			CRISPLD2	cysteine rich secretory protein LCCL domain containing 2	1.58	4.08e-06			CRISPLD2	cysteine rich secretory protein LCCL domain containing 2	1.61	2.98e-05			CRISPLD2	cysteine rich secretory protein LCCL domain containing 2	1.49674	6.32e-05
	CROT	carnitine O-octanoyltransferase	1.56	2.99e-05			CROT	carnitine O-octanoyltransferase	1.26	0.000218			CROT	carnitine O-octanoyltransferase	1.39	5.5e-05			CROT	carnitine O-octanoyltransferase	1.31922	0.000194
	CRYAB	crystallin alpha B	2.84	4.25e-07			CRYAB	crystallin alpha B	2.65	1.24e-06			CRYAB	crystallin alpha B	2.53	1.36e-06			CRYAB	crystallin alpha B	2.73285	6.83e-07
	CSTF3	cleavage stimulation factor subunit 3	-1.13	1.38e-06			CSTF3	cleavage stimulation factor subunit 3	-1.06	3.19e-06			CSTF3	cleavage stimulation factor subunit 3	-1.11	4.59e-07			CSTF3	cleavage stimulation factor subunit 3	-1.33073	1.69e-05
	CTHRC1	collagen triple helix repeat containing 1	2.03	1.11e-05			CTHRC1	collagen triple helix repeat containing 1	2.37	5.3e-06			CTHRC1	collagen triple helix repeat containing 1	2.29	1.46e-06			CTHRC1	collagen triple helix repeat containing 1	2.57773	2.25e-06
	CTSK	cathepsin K	1.04	2.23e-05			CTSK	cathepsin K	2.98	5.47e-08			CTSK	cathepsin K	3.7	1.88e-08			CTSK	cathepsin K	3.74935	3.1e-07
	CXCL1	C-X-C motif chemokine ligand 1	-2.71	7.08e-05			CXCL1	C-X-C motif chemokine ligand 1	-2.43	0.000241			CXCL1	C-X-C motif chemokine ligand 1	-2.92	1.85e-05			CXCL1	C-X-C motif chemokine ligand 1	-2.96024	3.52e-05
	CXCL6	C-X-C motif chemokine ligand 6	-1.77	8.86e-05			CXCL6	C-X-C motif chemokine ligand 6	-2	0.000222			CXCL6	C-X-C motif chemokine ligand 6	-2.94	8.34e-07			CXCL6	C-X-C motif chemokine ligand 6	-2.62064	1.1e-05
	CXCL8	C-X-C motif chemokine ligand 8	-4.17	1.27e-07			CXCL8	C-X-C motif chemokine ligand 8	-4.35	1.32e-06			CXCL8	C-X-C motif chemokine ligand 8	-5.43	1.31e-08			CXCL8	C-X-C motif chemokine ligand 8	-5.26074	3.27e-08
	CYBRD1	cytochrome b reductase 1	1.05	0.000261			CYBRD1	cytochrome b reductase 1	1.91	2.42e-06			CYBRD1	cytochrome b reductase 1	2.03	6.62e-07			CYBRD1	cytochrome b reductase 1	2.15074	9.92e-07
	CYP1B1	cytochrome P450 family 1 subfamily B member 1	-1.68	0.000402			CYP1B1	cytochrome P450 family 1 subfamily B member 1	-1.5	0.000867			CYP1B1	cytochrome P450 family 1 subfamily B member 1	-1.63	0.000711			CYP1B1	cytochrome P450 family 1 subfamily B member 1	-1.5503	0.00057
	CYP2S1	cytochrome P450 family 2 subfamily S member 1	-1.45	1.57e-05			CYP2S1	cytochrome P450 family 2 subfamily S member 1	-1.56	7.17e-06			CYP2S1	cytochrome P450 family 2 subfamily S member 1	-1.61	3.3e-06			CYP2S1	cytochrome P450 family 2 subfamily S member 1	-1.63186	7.93e-06
	DCBLD2	discoidin, CUB and LCCL domain containing 2	-1.36	3.56e-06			DCBLD2	discoidin, CUB and LCCL domain containing 2	-1.52	1.01e-05			DCBLD2	discoidin, CUB and LCCL domain containing 2	-1.97	1.6e-07			DCBLD2	discoidin, CUB and LCCL domain containing 2	-1.39079	4.91e-07
	DCN	decorin	1.31	8.65e-06			DCN	decorin	2.53	2.16e-07			DCN	decorin	2.38	2.88e-07			DCN	decorin	2.71214	1.06e-07
	DDAH1	dimethylarginine dimethylaminohydrolase 1	1.22	0.000725			DDAH1	dimethylarginine dimethylaminohydrolase 1	1.5	2.87e-05			DDAH1	dimethylarginine dimethylaminohydrolase 1	1.26	0.000302			DDAH1	dimethylarginine dimethylaminohydrolase 1	1.33825	0.000195
	DDIT4	DNA damage inducible transcript 4	2.17	1.06e-06			DDIT4	DNA damage inducible transcript 4	1.82	4.6e-06			DDIT4	DNA damage inducible transcript 4	1.61	6.16e-06			DDIT4	DNA damage inducible transcript 4	2.29513	1.65e-05
	DDX10	DEAD-box helicase 10	-1.97	1.62e-06			DDX10	DEAD-box helicase 10	-2.08	1.97e-07			DDX10	DEAD-box helicase 10	-2.18	4.6e-07			DDX10	DEAD-box helicase 10	-2.22055	5.15e-07
	DEPDC1	DEP domain containing 1	-1.16	9.23e-05			DEPDC1	DEP domain containing 1	-1.39	2.52e-05			DEPDC1	DEP domain containing 1	-1.54	7.58e-06			DEPDC1	DEP domain containing 1	-1.33272	4.81e-05
	DEPTOR	DEP domain containing MTOR-interacting protein	1.21	1.94e-06			DEPTOR	DEP domain containing MTOR-interacting protein	1.68	1.06e-06			DEPTOR	DEP domain containing MTOR-interacting protein	2.3	1.5e-08			DEPTOR	DEP domain containing MTOR-interacting protein	1.99653	9.76e-07
	DIRAS3	DIRAS family GTPase 3	-3.99	8.09e-08			DIRAS3	DIRAS family GTPase 3	-4.4	9.35e-08			DIRAS3	DIRAS family GTPase 3	-4.4	1.15e-08			DIRAS3	DIRAS family GTPase 3	-3.89432	6.81e-06
	DKK3	dickkopf WNT signaling pathway inhibitor 3	1.13	3.17e-05			DKK3	dickkopf WNT signaling pathway inhibitor 3	1.55	5.26e-06			DKK3	dickkopf WNT signaling pathway inhibitor 3	1.64	1.32e-06			DKK3	dickkopf WNT signaling pathway inhibitor 3	1.28994	1.19e-05
	DLGAP5	DLG associated protein 5	-1.25	2.23e-05			DLGAP5	DLG associated protein 5	-1.94	9.39e-07			DLGAP5	DLG associated protein 5	-2.14	1.13e-06			DLGAP5	DLG associated protein 5	-1.65284	2.78e-06
	DNAJC9	DnaJ heat shock protein family (Hsp40) member C9	-1.63	1.46e-05			DNAJC9	DnaJ heat shock protein family (Hsp40) member C9	-2.04	2.25e-06			DNAJC9	DnaJ heat shock protein family (Hsp40) member C9	-2.08	7.65e-07			DNAJC9	DnaJ heat shock protein family (Hsp40) member C9	-1.90406	1.39e-05
	DUSP23	dual specificity phosphatase 23	2.02	5.19e-07			DUSP23	dual specificity phosphatase 23	2.32	6.87e-07			DUSP23	dual specificity phosphatase 23	2.58	3.68e-08			DUSP23	dual specificity phosphatase 23	2.80803	1.4e-07
	E2F7	E2F transcription factor 7	-1.54	1.14e-06			E2F7	E2F transcription factor 7	-1.58	7.1e-07			E2F7	E2F transcription factor 7	-1.78	1.57e-07			E2F7	E2F transcription factor 7	-1.59244	1.88e-06
	ECM2	extracellular matrix protein 2	1.24	4.17e-05			ECM2	extracellular matrix protein 2	1.77	5.51e-07			ECM2	extracellular matrix protein 2	2.25	1.07e-07			ECM2	extracellular matrix protein 2	1.69373	1.37e-06
	ECT2	epithelial cell transforming 2	-1.1	0.00559			ECT2	epithelial cell transforming 2	-1.33	0.00312			ECT2	epithelial cell transforming 2	-1.51	0.000615			ECT2	epithelial cell transforming 2	-1.20462	0.0023
	ELL2	elongation factor for RNA polymerase II 2	1.05	5.76e-05			ELL2	elongation factor for RNA polymerase II 2	1.41	0.000191			ELL2	elongation factor for RNA polymerase II 2	1.42	5.84e-06			ELL2	elongation factor for RNA polymerase II 2	1.98957	1.1e-06
	EPAS1	endothelial PAS domain protein 1	1.83	1.27e-07			EPAS1	endothelial PAS domain protein 1	2.2	7.09e-06			EPAS1	endothelial PAS domain protein 1	2.23	4.6e-07			EPAS1	endothelial PAS domain protein 1	2.12892	3.28e-06
	ERRFI1	ERBB receptor feedback inhibitor 1	1.75	3.91e-06			ERRFI1	ERBB receptor feedback inhibitor 1	1.49	5.49e-06			ERRFI1	ERBB receptor feedback inhibitor 1	1.97	6.34e-06			ERRFI1	ERBB receptor feedback inhibitor 1	1.8388	4.35e-05
	EXOSC9	exosome component 9	-1.37	1.55e-06			EXOSC9	exosome component 9	-1.66	1.06e-06			EXOSC9	exosome component 9	-1.71	3.13e-07			EXOSC9	exosome component 9	-1.72494	3.68e-07
	FAM64A	family with sequence similarity 64 member A	-1.42	8.69e-07			FAM64A	family with sequence similarity 64 member A	-1.96	1.11e-07			FAM64A	family with sequence similarity 64 member A	-2.11	3e-08			FAM64A	family with sequence similarity 64 member A	-1.80558	2.17e-07
	FBLN1	fibulin 1	1.34	1.05e-05			FBLN1	fibulin 1	2.58	1.16e-05			FBLN1	fibulin 1	2.95	6.98e-09			FBLN1	fibulin 1	2.08918	1.88e-05
	FBLN5	fibulin 5	1.79	3.41e-07			FBLN5	fibulin 5	2.09	1.26e-05			FBLN5	fibulin 5	2.28	1.99e-08			FBLN5	fibulin 5	1.6799	6.21e-05
	FBXO32	F-box protein 32	2.32	1.12e-06			FBXO32	F-box protein 32	3.21	1.26e-07			FBXO32	F-box protein 32	3.76	5.79e-09			FBXO32	F-box protein 32	3.86383	2.72e-08
	FBXO5	F-box protein 5	-1.49	3.12e-05			FBXO5	F-box protein 5	-1.92	3.02e-06			FBXO5	F-box protein 5	-2	1.63e-06			FBXO5	F-box protein 5	-1.89131	7.36e-06
	FEN1	flap structure-specific endonuclease 1	-1.6	2.48e-07			FEN1	flap structure-specific endonuclease 1	-2.38	9.1e-08			FEN1	flap structure-specific endonuclease 1	-2.39	7.32e-08			FEN1	flap structure-specific endonuclease 1	-2.0263	3.65e-07
	FHL1	four and a half LIM domains 1	1.57	1.22e-06			FHL1	four and a half LIM domains 1	1.55	4.43e-06			FHL1	four and a half LIM domains 1	2.11	1.01e-06			FHL1	four and a half LIM domains 1	2.24054	3.64e-07
	FKBP5	FK506 binding protein 5	3.14	5.56e-08			FKBP5	FK506 binding protein 5	2.72	7.62e-08			FKBP5	FK506 binding protein 5	2.67	5.16e-07			FKBP5	FK506 binding protein 5	2.88543	8.22e-08
	FNDC1	fibronectin type III domain containing 1	1.28	6e-06			FNDC1	fibronectin type III domain containing 1	3.3	1.5e-05			FNDC1	fibronectin type III domain containing 1	3.02	1.57e-08			FNDC1	fibronectin type III domain containing 1	2.0733	0.00437
	FOSL1	FOS like 1, AP-1 transcription factor subunit	-1.12	2.08e-06			FOSL1	FOS like 1, AP-1 transcription factor subunit	-1.18	2.77e-05			FOSL1	FOS like 1, AP-1 transcription factor subunit	-1.43	2.75e-07			FOSL1	FOS like 1, AP-1 transcription factor subunit	-1.16062	3.12e-05
	FOXD1	forkhead box D1	-1.08	3.06e-05			FOXD1	forkhead box D1	-1.52	1.09e-06			FOXD1	forkhead box D1	-1.39	3.57e-06			FOXD1	forkhead box D1	-1.17671	0.000674
	FOXM1	forkhead box M1	-1.1	4.54e-07			FOXM1	forkhead box M1	-1.52	1.08e-06			FOXM1	forkhead box M1	-1.59	2.07e-08			FOXM1	forkhead box M1	-1.49887	1.1e-06
	FOXO1	forkhead box O1	1.71	8.81e-06			FOXO1	forkhead box O1	1.92	7.25e-06			FOXO1	forkhead box O1	2.48	1.28e-07			FOXO1	forkhead box O1	2.20295	5.15e-07
	FST	follistatin	-1.99	2.75e-06			FST	follistatin	-1.36	1.5e-05			FST	follistatin	-1.45	4.81e-05			FST	follistatin	-1.42929	0.000124
	FSTL3	follistatin like 3	1.15	8.67e-05			FSTL3	follistatin like 3	1.42	5.93e-05			FSTL3	follistatin like 3	1.55	0.000191			FSTL3	follistatin like 3	1.00962	0.00166
	GABBR2	gamma-aminobutyric acid type B receptor subunit 2	-1.35	7.4e-07			GABBR2	gamma-aminobutyric acid type B receptor subunit 2	-1.94	1.86e-07			GABBR2	gamma-aminobutyric acid type B receptor subunit 2	-2.28	9.85e-09			GABBR2	gamma-aminobutyric acid type B receptor subunit 2	-2.05789	6.83e-08
	GALNT12	polypeptide N-acetylgalactosaminyltransferase 12	-1.59	6.8e-07			GALNT12	polypeptide N-acetylgalactosaminyltransferase 12	-1.76	7.61e-08			GALNT12	polypeptide N-acetylgalactosaminyltransferase 12	-1.8	2.16e-08			GALNT12	polypeptide N-acetylgalactosaminyltransferase 12	-1.83983	7.06e-08
	GAS1	growth arrest specific 1	1.8	1.12e-06			GAS1	growth arrest specific 1	2.5	1.97e-07			GAS1	growth arrest specific 1	2.4	1.04e-07			GAS1	growth arrest specific 1	2.2172	3.1e-07
	GAS6	growth arrest specific 6	1.65	9.71e-07			GAS6	growth arrest specific 6	2.72	3.93e-06			GAS6	growth arrest specific 6	3.23	5.78e-08			GAS6	growth arrest specific 6	2.9255	2.6e-06
	GCHFR	GTP cyclohydrolase I feedback regulator	1.02	5.14e-06			GCHFR	GTP cyclohydrolase I feedback regulator	1.18	3.42e-05			GCHFR	GTP cyclohydrolase I feedback regulator	1.83	1.1e-06			GCHFR	GTP cyclohydrolase I feedback regulator	1.36403	7.62e-06
	GCNT1	glucosaminyl (N-acetyl) transferase 1, core 2	1.39	5.18e-07			GCNT1	glucosaminyl (N-acetyl) transferase 1, core 2	1.22	8e-07			GCNT1	glucosaminyl (N-acetyl) transferase 1, core 2	1.41	1.2e-07			GCNT1	glucosaminyl (N-acetyl) transferase 1, core 2	1.26111	1.85e-05
	GINS2	GINS complex subunit 2	-1.93	1.76e-06			GINS2	GINS complex subunit 2	-2.58	1.97e-07			GINS2	GINS complex subunit 2	-2.71	4.79e-08			GINS2	GINS complex subunit 2	-2.482	3.34e-07
	GK	glycerol kinase	-1.37	3.42e-05			GK	glycerol kinase	-1.32	2.43e-05			GK	glycerol kinase	-1.38	1.16e-05			GK	glycerol kinase	-1.44206	1.62e-05
	GLRX	glutaredoxin	1.18	9.35e-05			GLRX	glutaredoxin	1.72	0.00012			GLRX	glutaredoxin	1.45	1.74e-05			GLRX	glutaredoxin	1.87053	8.88e-06
	GLS	glutaminase	1.52	4.54e-07			GLS	glutaminase	2.73	1.39e-07			GLS	glutaminase	2.92	5.79e-09			GLS	glutaminase	2.6126	1.26e-07
	GPNMB	glycoprotein nmb	1.11	0.000298			GPNMB	glycoprotein nmb	1.77	4.56e-05			GPNMB	glycoprotein nmb	1.91	4.21e-06			GPNMB	glycoprotein nmb	1.45275	0.000444
	GRB14	growth factor receptor bound protein 14	-1.19	0.000144			GRB14	growth factor receptor bound protein 14	-1.46	2.95e-05			GRB14	growth factor receptor bound protein 14	-1.61	6.14e-06			GRB14	growth factor receptor bound protein 14	-1.61742	1.29e-05
	GSN	gelsolin	1.1	0.000233			GSN	gelsolin	1.83	4.83e-05			GSN	gelsolin	2.13	1.76e-06			GSN	gelsolin	1.70652	1.24e-05
	GSTM2	glutathione S-transferase mu 2 (muscle)	1.29	2.51e-06			GSTM2	glutathione S-transferase mu 2 (muscle)	1.06	1.45e-05			GSTM2	glutathione S-transferase mu 2 (muscle)	1.28	1.44e-06			GSTM2	glutathione S-transferase mu 2 (muscle)	1.01397	1.1e-05
	GSTT1	glutathione S-transferase theta 1	1.05	0.000272			GSTT1	glutathione S-transferase theta 1	1.3	1.94e-06			GSTT1	glutathione S-transferase theta 1	1.57	9.92e-07			GSTT1	glutathione S-transferase theta 1	1.27844	2.78e-06
	H2AFZ	H2A histone family member Z	-1.24	0.00012			H2AFZ	H2A histone family member Z	-1.46	1.26e-05			H2AFZ	H2A histone family member Z	-1.7	5.15e-06			H2AFZ	H2A histone family member Z	-1.43726	4.11e-05
	HACD1	3-hydroxyacyl-CoA dehydratase 1	1.27	0.000116			HACD1	3-hydroxyacyl-CoA dehydratase 1	1.63	4.96e-05			HACD1	3-hydroxyacyl-CoA dehydratase 1	1.36	0.000121			HACD1	3-hydroxyacyl-CoA dehydratase 1	1.27744	0.000928
	HEBP1	heme binding protein 1	1.02	0.000671			HEBP1	heme binding protein 1	1.07	0.000175			HEBP1	heme binding protein 1	1.23	8.87e-05			HEBP1	heme binding protein 1	1.1017	0.00039
	HEY2	hes related family bHLH transcription factor with YRPW motif 2	-1.35	8.42e-07			HEY2	hes related family bHLH transcription factor with YRPW motif 2	-1.47	4.08e-07			HEY2	hes related family bHLH transcription factor with YRPW motif 2	-1.43	2.35e-07			HEY2	hes related family bHLH transcription factor with YRPW motif 2	-1.45336	3.1e-07
	HIST1H2BK	histone cluster 1, H2bk	1.9	2.01e-07			HIST1H2BK	histone cluster 1, H2bk	2.65	3.89e-08			HIST1H2BK	histone cluster 1, H2bk	2.73	7.6e-08			HIST1H2BK	histone cluster 1, H2bk	3.20155	6e-08
	HIST1H4C	histone cluster 1, H4c	-2.22	1e-05			HIST1H4C	histone cluster 1, H4c	-2.61	2.76e-05			HIST1H4C	histone cluster 1, H4c	-2.16	1.11e-05			HIST1H4C	histone cluster 1, H4c	-2.41052	1.32e-05
	HJURP	Holliday junction recognition protein	-1.55	1.77e-07			HJURP	Holliday junction recognition protein	-1.91	1.16e-07			HJURP	Holliday junction recognition protein	-1.99	5.79e-09			HJURP	Holliday junction recognition protein	-1.81359	8.22e-08
	HMGA1	high mobility group AT-hook 1	-1.34	2.73e-07			HMGA1	high mobility group AT-hook 1	-1.78	3.26e-06			HMGA1	high mobility group AT-hook 1	-3.06	5.79e-09			HMGA1	high mobility group AT-hook 1	-2.62039	2.47e-07
	HMGB2	high mobility group box 2	-1.5	0.000318			HMGB2	high mobility group box 2	-1.78	7.81e-05			HMGB2	high mobility group box 2	-1.73	5.77e-05			HMGB2	high mobility group box 2	-1.73655	0.000115
	HMGN2	high mobility group nucleosomal binding domain 2	-1.58	1.84e-05			HMGN2	high mobility group nucleosomal binding domain 2	-1.89	2.71e-05			HMGN2	high mobility group nucleosomal binding domain 2	-1.93	5.68e-06			HMGN2	high mobility group nucleosomal binding domain 2	-1.63515	2.03e-05
	HMMR	hyaluronan mediated motility receptor	-1.2	2.75e-06			HMMR	hyaluronan mediated motility receptor	-1.44	6.1e-07			HMMR	hyaluronan mediated motility receptor	-1.53	2.84e-07			HMMR	hyaluronan mediated motility receptor	-1.45221	7.74e-07
	HPS5	HPS5, biogenesis of lysosomal organelles complex 2 subunit 2	1.63	9.41e-07			HPS5	HPS5, biogenesis of lysosomal organelles complex 2 subunit 2	1.22	7.79e-07			HPS5	HPS5, biogenesis of lysosomal organelles complex 2 subunit 2	1.53	3.17e-06			HPS5	HPS5, biogenesis of lysosomal organelles complex 2 subunit 2	1.47641	3.68e-06
	HS3ST3A1	heparan sulfate-glucosamine 3-sulfotransferase 3A1	-1.36	2.34e-06			HS3ST3A1	heparan sulfate-glucosamine 3-sulfotransferase 3A1	-1.55	4.83e-07			HS3ST3A1	heparan sulfate-glucosamine 3-sulfotransferase 3A1	-1.63	1.4e-07			HS3ST3A1	heparan sulfate-glucosamine 3-sulfotransferase 3A1	-1.6699	4.91e-07
	HSD11B1	hydroxysteroid 11-beta dehydrogenase 1	1.26	3.75e-06			HSD11B1	hydroxysteroid 11-beta dehydrogenase 1	2.87	4.98e-07			HSD11B1	hydroxysteroid 11-beta dehydrogenase 1	2.89	7.42e-07			HSD11B1	hydroxysteroid 11-beta dehydrogenase 1	3.46825	2.55e-08
	HSPB2	heat shock protein family B (small) member 2	1.09	6.62e-06			HSPB2	heat shock protein family B (small) member 2	1.23	2.56e-05			HSPB2	heat shock protein family B (small) member 2	1.6	1.09e-07			HSPB2	heat shock protein family B (small) member 2	1.36676	3.1e-07
	HSPB6	heat shock protein family B (small) member 6	1.08	0.000271			HSPB6	heat shock protein family B (small) member 6	1.92	0.000804			HSPB6	heat shock protein family B (small) member 6	1.59	0.00304			HSPB6	heat shock protein family B (small) member 6	1.90799	0.0144
	ID2	inhibitor of DNA binding 2, HLH protein	-1.38	3.11e-05			ID2	inhibitor of DNA binding 2, HLH protein	-1.47	2.73e-05			ID2	inhibitor of DNA binding 2, HLH protein	-1.57	9.6e-06			ID2	inhibitor of DNA binding 2, HLH protein	-1.5101	0.000571
	IFI44L	interferon induced protein 44 like	1.37	7.49e-07			IFI44L	interferon induced protein 44 like	1.61	2.78e-06			IFI44L	interferon induced protein 44 like	1.64	3.2e-06			IFI44L	interferon induced protein 44 like	1.60238	0.00048
	IFITM3	interferon induced transmembrane protein 3	1.12	0.000779			IFITM3	interferon induced transmembrane protein 3	1.51	0.000137			IFITM3	interferon induced transmembrane protein 3	1.45	0.000347			IFITM3	interferon induced transmembrane protein 3	1.49233	0.000191
	IGFBP5	insulin like growth factor binding protein 5	-1.06	0.0003			IGFBP5	insulin like growth factor binding protein 5	-2.09	1.74e-06			IGFBP5	insulin like growth factor binding protein 5	-1.38	4.15e-06			IGFBP5	insulin like growth factor binding protein 5	-1.7265	5.42e-06
	IL13RA2	interleukin 13 receptor subunit alpha 2	-1.44	1.9e-07			IL13RA2	interleukin 13 receptor subunit alpha 2	-1.46	9.35e-08			IL13RA2	interleukin 13 receptor subunit alpha 2	-1.54	1.57e-08			IL13RA2	interleukin 13 receptor subunit alpha 2	-1.46203	5.15e-07
	IL1B	interleukin 1 beta	-3.55	2.47e-06			IL1B	interleukin 1 beta	-3.83	1.24e-06			IL1B	interleukin 1 beta	-3.79	6.8e-07			IL1B	interleukin 1 beta	-3.79536	1.7e-06
	IL33	interleukin 33	-1.46	0.000323			IL33	interleukin 33	-1.12	0.00955			IL33	interleukin 33	-1.7	7.26e-05			IL33	interleukin 33	-1.55657	0.000111
	INMT	indolethylamine N-methyltransferase	3.01	9.58e-08			INMT	indolethylamine N-methyltransferase	3.49	9.49e-08			INMT	indolethylamine N-methyltransferase	4.29	1.54e-08			INMT	indolethylamine N-methyltransferase	3.842	7.91e-08
	IRS2	insulin receptor substrate 2	1.57	1e-06			IRS2	insulin receptor substrate 2	1.29	2.47e-05			IRS2	insulin receptor substrate 2	1.05	9.13e-05			IRS2	insulin receptor substrate 2	1.1597	0.00304
	ITGA2	integrin subunit alpha 2	-1.04	2.58e-05			ITGA2	integrin subunit alpha 2	-1.29	2.05e-05			ITGA2	integrin subunit alpha 2	-1.69	8.92e-07			ITGA2	integrin subunit alpha 2	-1.01111	3.12e-05
	KIAA0101	KIAA0101	-2.01	1.12e-06			KIAA0101	KIAA0101	-2.41	8.12e-07			KIAA0101	KIAA0101	-3.05	4.27e-08			KIAA0101	KIAA0101	-2.49748	3.65e-06
	KIF11	kinesin family member 11	-1.6	0.000105			KIF11	kinesin family member 11	-2.11	1.33e-05			KIF11	kinesin family member 11	-2.29	4.23e-06			KIF11	kinesin family member 11	-2.15604	1.17e-05
	KIF20A	kinesin family member 20A	-1.75	2.49e-06			KIF20A	kinesin family member 20A	-2.48	1.38e-07			KIF20A	kinesin family member 20A	-2.91	1.46e-08			KIF20A	kinesin family member 20A	-2.09694	3.44e-07
	KIF20B	kinesin family member 20B	-1.03	0.00101			KIF20B	kinesin family member 20B	-1.62	2.52e-05			KIF20B	kinesin family member 20B	-1.69	1.75e-05			KIF20B	kinesin family member 20B	-1.55783	4.13e-05
	KIF23	kinesin family member 23	-1.4	1.11e-05			KIF23	kinesin family member 23	-1.72	2.29e-06			KIF23	kinesin family member 23	-1.72	1.36e-06			KIF23	kinesin family member 23	-1.63374	3.23e-06
	KIF2C	kinesin family member 2C	-1.17	0.000118			KIF2C	kinesin family member 2C	-1.6	1.29e-05			KIF2C	kinesin family member 2C	-1.73	4.33e-06			KIF2C	kinesin family member 2C	-1.5823	1.72e-05
	KPNA2	karyopherin subunit alpha 2	-1.09	9.95e-06			KPNA2	karyopherin subunit alpha 2	-1.55	4.12e-06			KPNA2	karyopherin subunit alpha 2	-1.55	4.03e-07			KPNA2	karyopherin subunit alpha 2	-1.59698	2.61e-07
	KRT7	keratin 7	1.33	4.28e-06			KRT7	keratin 7	1.77	3.8e-07			KRT7	keratin 7	1.38	1.75e-05			KRT7	keratin 7	1.05148	2.49e-05
	LAMA2	laminin subunit alpha 2	1.53	1.27e-05			LAMA2	laminin subunit alpha 2	1.74	0.000359			LAMA2	laminin subunit alpha 2	1.66	8.14e-06			LAMA2	laminin subunit alpha 2	1.1964	0.00111
	LIMS2	LIM zinc finger domain containing 2	1.01	5.74e-05			LIMS2	LIM zinc finger domain containing 2	1.27	5.91e-06			LIMS2	LIM zinc finger domain containing 2	1.39	0.000333			LIMS2	LIM zinc finger domain containing 2	1.35223	9.55e-05
	LMCD1	LIM and cysteine rich domains 1	2.68	8.09e-08			LMCD1	LIM and cysteine rich domains 1	2.71	5.97e-08			LMCD1	LIM and cysteine rich domains 1	2.85	6.86e-09			LMCD1	LIM and cysteine rich domains 1	2.27308	8.66e-07
	LMNB2	lamin B2	-1.17	1.37e-05			LMNB2	lamin B2	-1.79	1.92e-06			LMNB2	lamin B2	-2.38	4.27e-08			LMNB2	lamin B2	-2.02074	1.8e-07
	LMO2	LIM domain only 2	-1.23	2.59e-05			LMO2	LIM domain only 2	-1.78	5.51e-07			LMO2	LIM domain only 2	-1.72	2.28e-07			LMO2	LIM domain only 2	-1.77353	4.62e-07
	LMO3	LIM domain only 3	1.58	6.22e-07			LMO3	LIM domain only 3	2.52	2.21e-08			LMO3	LIM domain only 3	2.74	4.81e-07			LMO3	LIM domain only 3	2.8059	4.66e-08
	LPXN	leupaxin	-2.71	6.22e-08			LPXN	leupaxin	-2.48	7.17e-07			LPXN	leupaxin	-3.1	1.15e-08			LPXN	leupaxin	-2.8283	3.79e-07
	LRIG1	leucine rich repeats and immunoglobulin like domains 1	-1.1	0.000246			LRIG1	leucine rich repeats and immunoglobulin like domains 1	-1.05	0.000118			LRIG1	leucine rich repeats and immunoglobulin like domains 1	-1.23	2.74e-05			LRIG1	leucine rich repeats and immunoglobulin like domains 1	-1.28528	0.000114
	LUM	lumican	1.78	1.41e-05			LUM	lumican	3.48	1.11e-07			LUM	lumican	3.89	2.28e-08			LUM	lumican	4.32917	6.64e-08
	LXN	latexin	-1.03	0.00245			LXN	latexin	-2.15	1.71e-05			LXN	latexin	-2.44	2.22e-06			LXN	latexin	-2.39196	2.34e-05
	MAD2L1	MAD2 mitotic arrest deficient-like 1 (yeast)	-1.64	0.000973			MAD2L1	MAD2 mitotic arrest deficient-like 1 (yeast)	-2.14	0.000163			MAD2L1	MAD2 mitotic arrest deficient-like 1 (yeast)	-2.38	5.26e-05			MAD2L1	MAD2 mitotic arrest deficient-like 1 (yeast)	-2.17236	0.000175
	MAOA	monoamine oxidase A	2.64	2.73e-07			MAOA	monoamine oxidase A	4.25	5.03e-08			MAOA	monoamine oxidase A	4.86	3.16e-09			MAOA	monoamine oxidase A	4.86413	2.93e-08
	MCM10	minichromosome maintenance 10 replication initiation factor	-1.32	4.39e-06			MCM10	minichromosome maintenance 10 replication initiation factor	-1.67	7.95e-07			MCM10	minichromosome maintenance 10 replication initiation factor	-1.78	4.36e-07			MCM10	minichromosome maintenance 10 replication initiation factor	-1.64924	2.03e-06
	MCM2	minichromosome maintenance complex component 2	-1.16	4.4e-05			MCM2	minichromosome maintenance complex component 2	-1.53	4.77e-06			MCM2	minichromosome maintenance complex component 2	-1.57	3.18e-06			MCM2	minichromosome maintenance complex component 2	-1.46966	1.93e-05
	MCM3	minichromosome maintenance complex component 3	-1.33	1.43e-05			MCM3	minichromosome maintenance complex component 3	-1.97	9.42e-07			MCM3	minichromosome maintenance complex component 3	-2.14	4.59e-07			MCM3	minichromosome maintenance complex component 3	-1.92594	1.75e-06
	MCM5	minichromosome maintenance complex component 5	-1.26	1.51e-05			MCM5	minichromosome maintenance complex component 5	-1.6	1.94e-06			MCM5	minichromosome maintenance complex component 5	-1.7	4.58e-07			MCM5	minichromosome maintenance complex component 5	-1.52159	3.14e-06
	MCM6	minichromosome maintenance complex component 6	-1.07	0.0004			MCM6	minichromosome maintenance complex component 6	-1.41	1.04e-05			MCM6	minichromosome maintenance complex component 6	-1.24	8.86e-06			MCM6	minichromosome maintenance complex component 6	-1.24354	8.64e-05
	MCM7	minichromosome maintenance complex component 7	-1.99	4.45e-06			MCM7	minichromosome maintenance complex component 7	-3.03	3.98e-07			MCM7	minichromosome maintenance complex component 7	-3.24	8.19e-08			MCM7	minichromosome maintenance complex component 7	-2.9431	1.59e-06
	MELK	maternal embryonic leucine zipper kinase	-1.25	3.09e-05			MELK	maternal embryonic leucine zipper kinase	-1.36	1.54e-05			MELK	maternal embryonic leucine zipper kinase	-1.57	2.4e-06			MELK	maternal embryonic leucine zipper kinase	-1.25631	1.19e-05
	METTL7A	methyltransferase like 7A	1.34	0.00311			METTL7A	methyltransferase like 7A	1.88	0.000261			METTL7A	methyltransferase like 7A	2.19	0.000189			METTL7A	methyltransferase like 7A	2.57449	5.13e-06
	MGARP	mitochondria localized glutamic acid rich protein	1.07	2e-05			MGARP	mitochondria localized glutamic acid rich protein	1.77	8.03e-07			MGARP	mitochondria localized glutamic acid rich protein	1.79	1.25e-06			MGARP	mitochondria localized glutamic acid rich protein	1.55452	5.67e-06
	MGP	matrix Gla protein	3.49	1.02e-08			MGP	matrix Gla protein	4.35	5.1e-09			MGP	matrix Gla protein	4.42	1.59e-09			MGP	matrix Gla protein	4.41286	2.56e-08
	MGST1	microsomal glutathione S-transferase 1	1.11	3.71e-05			MGST1	microsomal glutathione S-transferase 1	1.21	1.8e-05			MGST1	microsomal glutathione S-transferase 1	1.4	4.89e-06			MGST1	microsomal glutathione S-transferase 1	2.00325	9.3e-06
	MID1	midline 1	1.45	4.7e-05			MID1	midline 1	1.29	0.00011			MID1	midline 1	1.47	2.18e-05			MID1	midline 1	1.10734	0.000231
	MMP1	matrix metallopeptidase 1	-3.77	6.87e-05			MMP1	matrix metallopeptidase 1	-3.91	3.67e-05			MMP1	matrix metallopeptidase 1	-3.77	2.95e-05			MMP1	matrix metallopeptidase 1	-3.58796	6.39e-05
	MMP16	matrix metallopeptidase 16	-1.01	9.09e-05			MMP16	matrix metallopeptidase 16	-1.21	1.4e-05			MMP16	matrix metallopeptidase 16	-1.32	3.49e-06			MMP16	matrix metallopeptidase 16	-1.24012	1.69e-05
	MMP23B	matrix metallopeptidase 23B	1.19	0.000404			MMP23B	matrix metallopeptidase 23B	2.29	7.59e-07			MMP23B	matrix metallopeptidase 23B	2.56	4.6e-07			MMP23B	matrix metallopeptidase 23B	2.61272	5.07e-07
	MT1M	metallothionein 1M	1.35	0.00013			MT1M	metallothionein 1M	1.55	5.19e-05			MT1M	metallothionein 1M	1.43	7.45e-05			MT1M	metallothionein 1M	1.43836	0.00151
	MT1X	metallothionein 1X	1.68	4.26e-05			MT1X	metallothionein 1X	1.98	5.9e-06			MT1X	metallothionein 1X	2.21	2.56e-06			MT1X	metallothionein 1X	2.61893	3.28e-06
	MTSS1	metastasis suppressor 1	1.06	7.76e-06			MTSS1	metastasis suppressor 1	1.67	1.44e-05			MTSS1	metastasis suppressor 1	1.29	3.28e-07			MTSS1	metastasis suppressor 1	1.33716	4.91e-07
	MXD4	MAX dimerization protein 4	1.49	2.23e-05			MXD4	MAX dimerization protein 4	1.63	1.5e-05			MXD4	MAX dimerization protein 4	1.91	1.55e-06			MXD4	MAX dimerization protein 4	1.31945	7.16e-05
	MYL9	myosin light chain 9	1.71	6.11e-06			MYL9	myosin light chain 9	2.46	7.58e-08			MYL9	myosin light chain 9	2.7	1.39e-07			MYL9	myosin light chain 9	2.43602	2.03e-06
	NCAPG	non-SMC condensin I complex subunit G	-1.73	3.27e-05			NCAPG	non-SMC condensin I complex subunit G	-2.21	6.88e-06			NCAPG	non-SMC condensin I complex subunit G	-2.43	1.37e-06			NCAPG	non-SMC condensin I complex subunit G	-2.25645	4.96e-06
	NCEH1	neutral cholesterol ester hydrolase 1	-1.45	3.75e-06			NCEH1	neutral cholesterol ester hydrolase 1	-1.62	1.89e-06			NCEH1	neutral cholesterol ester hydrolase 1	-1.81	1.51e-06			NCEH1	neutral cholesterol ester hydrolase 1	-1.74131	2.2e-06
	NDC80	NDC80, kinetochore complex component	-1.01	0.000649			NDC80	NDC80, kinetochore complex component	-1.26	0.000128			NDC80	NDC80, kinetochore complex component	-1.38	5.34e-05			NDC80	NDC80, kinetochore complex component	-1.29869	0.000139
	NDUFA4L2	NDUFA4, mitochondrial complex associated like 2	-1.11	0.000143			NDUFA4L2	NDUFA4, mitochondrial complex associated like 2	-2.09	1.22e-06			NDUFA4L2	NDUFA4, mitochondrial complex associated like 2	-2.01	2.06e-06			NDUFA4L2	NDUFA4, mitochondrial complex associated like 2	-2.03047	1.97e-06
	NEK2	NIMA related kinase 2	-1.42	0.00109			NEK2	NIMA related kinase 2	-1.86	0.000125			NEK2	NIMA related kinase 2	-1.88	6.7e-05			NEK2	NIMA related kinase 2	-1.7179	0.000203
	NEO1	neogenin 1	1.44	8.02e-06			NEO1	neogenin 1	1.09	0.000109			NEO1	neogenin 1	1.29	4.12e-07			NEO1	neogenin 1	1.06603	6.25e-05
	NKD2	naked cuticle homolog 2	-1.1	4.22e-05			NKD2	naked cuticle homolog 2	-1.32	1.51e-05			NKD2	naked cuticle homolog 2	-1.42	4.32e-06			NKD2	naked cuticle homolog 2	-1.49788	7.68e-06
	NPTX1	neuronal pentraxin 1	-1.59	0.0049			NPTX1	neuronal pentraxin 1	-1.63	0.0036			NPTX1	neuronal pentraxin 1	-1.61	0.00271			NPTX1	neuronal pentraxin 1	-1.38695	0.0109
	NPTX2	neuronal pentraxin 2	1.16	2.53e-06			NPTX2	neuronal pentraxin 2	2.53	1.26e-07			NPTX2	neuronal pentraxin 2	2.37	7.8e-08			NPTX2	neuronal pentraxin 2	2.86577	3.43e-08
	NRIP3	nuclear receptor interacting protein 3	-1.48	1.02e-06			NRIP3	nuclear receptor interacting protein 3	-1.5	3.57e-06			NRIP3	nuclear receptor interacting protein 3	-1.36	1.02e-06			NRIP3	nuclear receptor interacting protein 3	-1.52307	3.3e-06
	NT5E	5'-nucleotidase ecto	-1.28	0.00537			NT5E	5'-nucleotidase ecto	-1.36	0.00243			NT5E	5'-nucleotidase ecto	-2.03	0.000114			NT5E	5'-nucleotidase ecto	-1.80871	0.000467
	NTM	neurotrimin	-1.71	1.05e-06			NTM	neurotrimin	-1.51	2.19e-06			NTM	neurotrimin	-2.13	1.01e-07			NTM	neurotrimin	-2.35248	1.87e-07
	NUDT1	nudix hydrolase 1	-1.3	1.84e-05			NUDT1	nudix hydrolase 1	-1.19	7.54e-05			NUDT1	nudix hydrolase 1	-1.15	3.58e-05			NUDT1	nudix hydrolase 1	-1.23758	0.00041
	NUPR1	nuclear protein 1, transcriptional regulator	1.28	2.77e-06			NUPR1	nuclear protein 1, transcriptional regulator	2.6	7.85e-07			NUPR1	nuclear protein 1, transcriptional regulator	2.9	3.16e-09			NUPR1	nuclear protein 1, transcriptional regulator	2.60761	6.83e-08
	NUSAP1	nucleolar and spindle associated protein 1	-1.86	8.65e-06			NUSAP1	nucleolar and spindle associated protein 1	-2.31	1.25e-06			NUSAP1	nucleolar and spindle associated protein 1	-1.54	3.56e-07			NUSAP1	nucleolar and spindle associated protein 1	-1.40018	5.8e-06
	ODC1	ornithine decarboxylase 1	-1.84	8.71e-07			ODC1	ornithine decarboxylase 1	-2.28	1.38e-07			ODC1	ornithine decarboxylase 1	-2.36	2.35e-07			ODC1	ornithine decarboxylase 1	-2.03269	2.1e-07
	OIP5	Opa interacting protein 5	-1.09	1.46e-06			OIP5	Opa interacting protein 5	-1.37	5.9e-06			OIP5	Opa interacting protein 5	-1.56	4.64e-07			OIP5	Opa interacting protein 5	-1.24041	1.78e-06
	OLFML3	olfactomedin like 3	1.6	1.14e-06			OLFML3	olfactomedin like 3	1.78	4.12e-06			OLFML3	olfactomedin like 3	2.16	1.43e-06			OLFML3	olfactomedin like 3	1.75204	1.27e-05
	OPTN	optineurin	1.44	2.57e-06			OPTN	optineurin	1.92	2.22e-07			OPTN	optineurin	2.02	1.22e-06			OPTN	optineurin	1.7166	4.89e-06
	OXTR	oxytocin receptor	1.69	9.15e-08			OXTR	oxytocin receptor	2.07	1.49e-07			OXTR	oxytocin receptor	1.9	1.83e-05			OXTR	oxytocin receptor	1.74058	8.85e-08
	PALLD	palladin, cytoskeletal associated protein	1.59	1.76e-07			PALLD	palladin, cytoskeletal associated protein	1.73	4.64e-07			PALLD	palladin, cytoskeletal associated protein	1.88	3.4e-07			PALLD	palladin, cytoskeletal associated protein	1.61521	1.03e-05
	PAPPA	pappalysin 1	-1.9	1.06e-06			PAPPA	pappalysin 1	-1.59	2.18e-07			PAPPA	pappalysin 1	-2.01	1.13e-08			PAPPA	pappalysin 1	-1.94965	4.33e-06
	PAQR4	progestin and adipoQ receptor family member 4	-1.08	0.00147			PAQR4	progestin and adipoQ receptor family member 4	-1.34	0.00033			PAQR4	progestin and adipoQ receptor family member 4	-1.3	0.000245			PAQR4	progestin and adipoQ receptor family member 4	-1.2633	0.000523
	PBK	PDZ binding kinase	-1.7	3.05e-06			PBK	PDZ binding kinase	-2.22	4.82e-07			PBK	PDZ binding kinase	-2.26	1.88e-07			PBK	PDZ binding kinase	-1.9242	2.25e-06
	PCNA	proliferating cell nuclear antigen	-1.26	0.00975			PCNA	proliferating cell nuclear antigen	-1.53	0.00282			PCNA	proliferating cell nuclear antigen	-1.82	9.48e-05			PCNA	proliferating cell nuclear antigen	-1.30664	0.00145
	PDE1A	phosphodiesterase 1A	1.66	6.66e-07			PDE1A	phosphodiesterase 1A	2.54	1.38e-07			PDE1A	phosphodiesterase 1A	2.38	2.96e-08			PDE1A	phosphodiesterase 1A	3.29631	3.45e-07
	PDE7B	phosphodiesterase 7B	-1.64	0.000112			PDE7B	phosphodiesterase 7B	-1.6	9.59e-05			PDE7B	phosphodiesterase 7B	-1.43	0.000524			PDE7B	phosphodiesterase 7B	-1.73691	0.000218
	PDGFD	platelet derived growth factor D	2.68	6.22e-08			PDGFD	platelet derived growth factor D	2.78	7.35e-08			PDGFD	platelet derived growth factor D	3.11	3.16e-09			PDGFD	platelet derived growth factor D	3.30199	4.66e-08
	PDGFRB	platelet derived growth factor receptor beta	2.08	2.47e-06			PDGFRB	platelet derived growth factor receptor beta	2.14	1.16e-05			PDGFRB	platelet derived growth factor receptor beta	2.42	9.49e-07			PDGFRB	platelet derived growth factor receptor beta	2.23884	8.78e-05
	PFKP	phosphofructokinase, platelet	-1.29	6.47e-06			PFKP	phosphofructokinase, platelet	-1.81	1.33e-06			PFKP	phosphofructokinase, platelet	-2.33	3.47e-07			PFKP	phosphofructokinase, platelet	-2.13496	4.9e-07
	PGM1	phosphoglucomutase 1	1.96	6.58e-07			PGM1	phosphoglucomutase 1	1.41	1.11e-05			PGM1	phosphoglucomutase 1	1.55	1.12e-06			PGM1	phosphoglucomutase 1	1.28695	5.09e-06
	PHLDA1	pleckstrin homology like domain family A member 1	-1.79	1.76e-06			PHLDA1	pleckstrin homology like domain family A member 1	-2.51	5.16e-07			PHLDA1	pleckstrin homology like domain family A member 1	-3.01	3.28e-07			PHLDA1	pleckstrin homology like domain family A member 1	-2.50667	2.97e-05
	PLAU	plasminogen activator, urokinase	-3.22	5.56e-08			PLAU	plasminogen activator, urokinase	-3.35	5.03e-08			PLAU	plasminogen activator, urokinase	-3.03	1.96e-08			PLAU	plasminogen activator, urokinase	-3.08027	2.61e-07
	PLCXD3	phosphatidylinositol specific phospholipase C X domain containing 3	1.49	6.42e-07			PLCXD3	phosphatidylinositol specific phospholipase C X domain containing 3	2.86	6.91e-07			PLCXD3	phosphatidylinositol specific phospholipase C X domain containing 3	2.75	1.46e-08			PLCXD3	phosphatidylinositol specific phospholipase C X domain containing 3	3.41089	2.93e-08
	PLEK2	pleckstrin 2	-1.22	1.27e-05			PLEK2	pleckstrin 2	-1.65	3.45e-06			PLEK2	pleckstrin 2	-1.78	7.15e-07			PLEK2	pleckstrin 2	-1.89022	1.84e-06
	PLIN2	perilipin 2	1.1	8.64e-06			PLIN2	perilipin 2	1.65	5.82e-06			PLIN2	perilipin 2	1.95	5.2e-07			PLIN2	perilipin 2	1.96047	1.17e-06
	PLK4	polo like kinase 4	-1.2	6.58e-07			PLK4	polo like kinase 4	-1.54	1.51e-07			PLK4	polo like kinase 4	-1.67	5.2e-08			PLK4	polo like kinase 4	-1.58427	1.43e-07
	PLSCR4	phospholipid scramblase 4	1.02	0.000488			PLSCR4	phospholipid scramblase 4	1.83	4.17e-06			PLSCR4	phospholipid scramblase 4	1.75	4.89e-06			PLSCR4	phospholipid scramblase 4	1.66291	0.000103
	POC1A	POC1 centriolar protein A	-1.18	0.000124			POC1A	POC1 centriolar protein A	-1.57	2.23e-05			POC1A	POC1 centriolar protein A	-1.56	1.89e-05			POC1A	POC1 centriolar protein A	-1.37924	9.08e-05
	PODXL	podocalyxin like	-1.7	5.56e-08			PODXL	podocalyxin like	-2.2	1.41e-07			PODXL	podocalyxin like	-2.27	4.12e-08			PODXL	podocalyxin like	-2.27185	1.8e-07
	PPIC	peptidylprolyl isomerase C	1.1	0.000239			PPIC	peptidylprolyl isomerase C	1.39	9.82e-06			PPIC	peptidylprolyl isomerase C	1.81	2.33e-06			PPIC	peptidylprolyl isomerase C	2.05062	6.81e-06
	PPP1R14A	protein phosphatase 1 regulatory inhibitor subunit 14A	1.77	5.19e-07			PPP1R14A	protein phosphatase 1 regulatory inhibitor subunit 14A	3.65	6.3e-08			PPP1R14A	protein phosphatase 1 regulatory inhibitor subunit 14A	4.14	9.93e-08			PPP1R14A	protein phosphatase 1 regulatory inhibitor subunit 14A	4.16545	2.02e-08
	PPP1R15A	protein phosphatase 1 regulatory subunit 15A	-1.3	3.29e-05			PPP1R15A	protein phosphatase 1 regulatory subunit 15A	-1.44	3.02e-05			PPP1R15A	protein phosphatase 1 regulatory subunit 15A	-1.18	3.42e-05			PPP1R15A	protein phosphatase 1 regulatory subunit 15A	-1.0539	0.000162
	PRC1	protein regulator of cytokinesis 1	-1.81	1.46e-06			PRC1	protein regulator of cytokinesis 1	-2.9	5.47e-08			PRC1	protein regulator of cytokinesis 1	-3.53	5.79e-09			PRC1	protein regulator of cytokinesis 1	-2.61646	1.1e-07
	PRDM8	PR/SET domain 8	-1.07	0.000392			PRDM8	PR/SET domain 8	-1.99	2.92e-05			PRDM8	PR/SET domain 8	-1.8	1.13e-05			PRDM8	PR/SET domain 8	-2.15901	2.87e-05
	PROS1	protein S (alpha)	2.11	2.75e-06			PROS1	protein S (alpha)	3.16	6.52e-07			PROS1	protein S (alpha)	3.72	5.87e-08			PROS1	protein S (alpha)	3.40196	7.13e-07
	PRRX2	paired related homeobox 2	-1.45	2.85e-05			PRRX2	paired related homeobox 2	-2.32	6.1e-07			PRRX2	paired related homeobox 2	-2.42	7.06e-07			PRRX2	paired related homeobox 2	-2.65739	3.73e-06
	PRSS23	protease, serine 23	1.06	0.000624			PRSS23	protease, serine 23	1.52	0.000248			PRSS23	protease, serine 23	1.62	1.28e-05			PRSS23	protease, serine 23	1.55816	3.8e-05
	PRSS3	protease, serine 3	-1.77	3.81e-06			PRSS3	protease, serine 3	-2.11	9.48e-07			PRSS3	protease, serine 3	-2.42	2.71e-07			PRSS3	protease, serine 3	-2.68389	1.21e-06
	PRUNE2	prune homolog 2	1.23	1.4e-05			PRUNE2	prune homolog 2	2.01	5.03e-08			PRUNE2	prune homolog 2	2.19	1.46e-08			PRUNE2	prune homolog 2	2.4237	1.4e-06
	PTGDS	prostaglandin D2 synthase	1.19	8.47e-07			PTGDS	prostaglandin D2 synthase	2.92	6.08e-08			PTGDS	prostaglandin D2 synthase	3.56	1.8e-09			PTGDS	prostaglandin D2 synthase	3.1872	1.08e-05
	PTN	pleiotrophin	1.36	3.44e-05			PTN	pleiotrophin	1.65	1.34e-05			PTN	pleiotrophin	1.85	6.64e-06			PTN	pleiotrophin	1.82017	2.16e-05
	PTTG1	pituitary tumor-transforming 1	-2.26	5.56e-08			PTTG1	pituitary tumor-transforming 1	-2.85	2.21e-08			PTTG1	pituitary tumor-transforming 1	-3.13	5.2e-08			PTTG1	pituitary tumor-transforming 1	-2.66606	1.25e-06
	PTTG3P	pituitary tumor-transforming 3, pseudogene	-2.11	1.55e-05			PTTG3P	pituitary tumor-transforming 3, pseudogene	-2.68	3.59e-06			PTTG3P	pituitary tumor-transforming 3, pseudogene	-3.02	9.3e-07			PTTG3P	pituitary tumor-transforming 3, pseudogene	-2.7479	5.51e-06
	QPRT	quinolinate phosphoribosyltransferase	1.12	2.84e-06			QPRT	quinolinate phosphoribosyltransferase	1.96	1.83e-06			QPRT	quinolinate phosphoribosyltransferase	2.56	2.84e-07			QPRT	quinolinate phosphoribosyltransferase	2.28014	3.28e-06
	RAB11FIP1	RAB11 family interacting protein 1	2.16	3.49e-07			RAB11FIP1	RAB11 family interacting protein 1	2.35	5.47e-08			RAB11FIP1	RAB11 family interacting protein 1	2.74	9.15e-09			RAB11FIP1	RAB11 family interacting protein 1	1.75877	1.2e-07
	RACGAP1	Rac GTPase activating protein 1	-1.4	1.12e-06			RACGAP1	Rac GTPase activating protein 1	-1.72	5.85e-07			RACGAP1	Rac GTPase activating protein 1	-1.94	5.16e-07			RACGAP1	Rac GTPase activating protein 1	-1.55794	1.72e-06
	RAD51AP1	RAD51 associated protein 1	-1.33	7.72e-06			RAD51AP1	RAD51 associated protein 1	-1.64	1.68e-06			RAD51AP1	RAD51 associated protein 1	-1.67	8.38e-07			RAD51AP1	RAD51 associated protein 1	-1.58527	3.24e-06
	RAMP1	receptor activity modifying protein 1	1.36	2.07e-05			RAMP1	receptor activity modifying protein 1	1.39	1.49e-07			RAMP1	receptor activity modifying protein 1	1.55	1.55e-05			RAMP1	receptor activity modifying protein 1	1.36768	1.56e-06
	RARRES3	retinoic acid receptor responder 3	1.55	2.73e-07			RARRES3	retinoic acid receptor responder 3	1.47	1.06e-06			RARRES3	retinoic acid receptor responder 3	1.98	2.95e-07			RARRES3	retinoic acid receptor responder 3	1.84782	1.63e-07
	RASL11B	RAS like family 11 member B	1.46	1.11e-06			RASL11B	RAS like family 11 member B	2.19	8.39e-08			RASL11B	RAS like family 11 member B	2.47	2.16e-08			RASL11B	RAS like family 11 member B	2.07058	1.51e-07
	RFC4	replication factor C subunit 4	-1.1	6.42e-07			RFC4	replication factor C subunit 4	-1.19	7.33e-06			RFC4	replication factor C subunit 4	-1.16	2.68e-07			RFC4	replication factor C subunit 4	-1.17361	2.43e-05
	RGCC	regulator of cell cycle	3.72	2.13e-08			RGCC	regulator of cell cycle	4.05	5.1e-09			RGCC	regulator of cell cycle	4.49	1.3e-08			RGCC	regulator of cell cycle	4.18992	2.56e-07
	RNASEH2A	ribonuclease H2 subunit A	-1.01	0.000124			RNASEH2A	ribonuclease H2 subunit A	-1.3	2.62e-05			RNASEH2A	ribonuclease H2 subunit A	-1.28	1.91e-05			RNASEH2A	ribonuclease H2 subunit A	-1.1553	7.72e-05
	RPS29	ribosomal protein S29	1.97	3.3e-07			RPS29	ribosomal protein S29	2.19	3.93e-07			RPS29	ribosomal protein S29	2.61	2.25e-08			RPS29	ribosomal protein S29	2.01232	3.5e-05
	RPS6KA2	ribosomal protein S6 kinase A2	1.8	4.74e-07			RPS6KA2	ribosomal protein S6 kinase A2	1.97	2.1e-07			RPS6KA2	ribosomal protein S6 kinase A2	2.01	8.97e-08			RPS6KA2	ribosomal protein S6 kinase A2	2.02563	7.56e-07
	RRM1	ribonucleotide reductase catalytic subunit M1	-1.47	2.65e-06			RRM1	ribonucleotide reductase catalytic subunit M1	-1.87	4.64e-07			RRM1	ribonucleotide reductase catalytic subunit M1	-1.87	1.4e-07			RRM1	ribonucleotide reductase catalytic subunit M1	-1.78717	5.15e-07
	S100A4	S100 calcium binding protein A4	1.81	6.22e-07			S100A4	S100 calcium binding protein A4	1.77	1.89e-06			S100A4	S100 calcium binding protein A4	1.71	1.82e-07			S100A4	S100 calcium binding protein A4	1.45001	3.05e-06
	SEC14L1	SEC14 like lipid binding 1	1.56	2.9e-06			SEC14L1	SEC14 like lipid binding 1	1.19	9.71e-06			SEC14L1	SEC14 like lipid binding 1	1.28	2.45e-05			SEC14L1	SEC14 like lipid binding 1	1.41001	2.49e-05
	SEMA3A	semaphorin 3A	-1.12	1.32e-05			SEMA3A	semaphorin 3A	-1.18	9.71e-06			SEMA3A	semaphorin 3A	-1.13	6.44e-06			SEMA3A	semaphorin 3A	-1.17851	5.35e-05
	SEPTIN11	septin 11	1.19	0.00421			SEPTIN11	septin 11	1.16	0.000564			SEPTIN11	septin 11	1.04	0.000421			SEPTIN11	septin 11	1.25572	0.000285
	SGCG	sarcoglycan gamma	1.01	9.65e-05			SGCG	sarcoglycan gamma	1.54	2.18e-07			SGCG	sarcoglycan gamma	1.86	3.93e-08			SGCG	sarcoglycan gamma	1.86935	5.07e-07
	SH3BGRL	SH3 domain binding glutamate rich protein like	1.19	0.000644			SH3BGRL	SH3 domain binding glutamate rich protein like	1.84	0.000117			SH3BGRL	SH3 domain binding glutamate rich protein like	1.95	1.07e-05			SH3BGRL	SH3 domain binding glutamate rich protein like	1.94313	5.67e-05
	SH3KBP1	SH3 domain containing kinase binding protein 1	-1.24	5.9e-06			SH3KBP1	SH3 domain containing kinase binding protein 1	-1.09	1.39e-05			SH3KBP1	SH3 domain containing kinase binding protein 1	-1.2	5.28e-06			SH3KBP1	SH3 domain containing kinase binding protein 1	-1.1525	2.08e-05
	SKA1	spindle and kinetochore associated complex subunit 1	-1.1	2e-05			SKA1	spindle and kinetochore associated complex subunit 1	-1.21	2.81e-05			SKA1	spindle and kinetochore associated complex subunit 1	-1.28	5.43e-06			SKA1	spindle and kinetochore associated complex subunit 1	-1.24441	6.74e-06
	SLC14A1	solute carrier family 14 member 1 (Kidd blood group)	-1.31	4.88e-07			SLC14A1	solute carrier family 14 member 1 (Kidd blood group)	-1.33	4.24e-07			SLC14A1	solute carrier family 14 member 1 (Kidd blood group)	-1.38	4.6e-07			SLC14A1	solute carrier family 14 member 1 (Kidd blood group)	-1.33128	5.15e-07
	SLC40A1	solute carrier family 40 member 1	1.36	1.46e-06			SLC40A1	solute carrier family 40 member 1	3.34	3.89e-08			SLC40A1	solute carrier family 40 member 1	3.96	3e-08			SLC40A1	solute carrier family 40 member 1	3.88134	1.19e-07
	SLC7A1	solute carrier family 7 member 1	-1.68	1.57e-05			SLC7A1	solute carrier family 7 member 1	-2.13	3.07e-06			SLC7A1	solute carrier family 7 member 1	-2.49	6.75e-07			SLC7A1	solute carrier family 7 member 1	-2.20697	4.01e-06
	SLC7A11	solute carrier family 7 member 11	-1.06	2.99e-05			SLC7A11	solute carrier family 7 member 11	-1.17	1.34e-05			SLC7A11	solute carrier family 7 member 11	-1.02	4.67e-05			SLC7A11	solute carrier family 7 member 11	-1.09609	2.37e-05
	SMS	spermine synthase	-1.12	0.000134			SMS	spermine synthase	-1.29	1.24e-05			SMS	spermine synthase	-1.38	5.8e-06			SMS	spermine synthase	-1.10579	4.11e-05
	SNAI2	snail family transcriptional repressor 2	1.23	0.00014			SNAI2	snail family transcriptional repressor 2	1.09	0.000301			SNAI2	snail family transcriptional repressor 2	1.09	0.000517			SNAI2	snail family transcriptional repressor 2	1.43643	0.000136
	SORT1	sortilin 1	1.03	2.75e-06			SORT1	sortilin 1	2.28	6.15e-08			SORT1	sortilin 1	2.67	1.8e-09			SORT1	sortilin 1	2.5416	2.82e-07
	SOST	sclerostin	-3.28	1e-07			SOST	sclerostin	-4.47	1.21e-08			SOST	sclerostin	-4.47	3.71e-09			SOST	sclerostin	-4.55565	2.24e-08
	SPC24	SPC24, NDC80 kinetochore complex component	-1.44	1.42e-06			SPC24	SPC24, NDC80 kinetochore complex component	-1.73	5.47e-08			SPC24	SPC24, NDC80 kinetochore complex component	-1.73	1.21e-08			SPC24	SPC24, NDC80 kinetochore complex component	-1.68161	1.88e-07
	SPC25	SPC25, NDC80 kinetochore complex component	-1.15	4.51e-06			SPC25	SPC25, NDC80 kinetochore complex component	-1.32	2.69e-06			SPC25	SPC25, NDC80 kinetochore complex component	-1.35	3.88e-07			SPC25	SPC25, NDC80 kinetochore complex component	-1.32622	1.02e-06
	SRPX2	sushi repeat containing protein, X-linked 2	1.44	0.000109			SRPX2	sushi repeat containing protein, X-linked 2	2.06	5.65e-05			SRPX2	sushi repeat containing protein, X-linked 2	1.79	6.87e-05			SRPX2	sushi repeat containing protein, X-linked 2	1.86413	7.99e-05
	STAT2	signal transducer and activator of transcription 2	1.14	1.47e-06			STAT2	signal transducer and activator of transcription 2	1.34	2.29e-06			STAT2	signal transducer and activator of transcription 2	1.61	8.04e-06			STAT2	signal transducer and activator of transcription 2	1.32276	4.96e-06
	STIL	SCL/TAL1 interrupting locus	-1.13	0.000272			STIL	SCL/TAL1 interrupting locus	-1.54	4.81e-05			STIL	SCL/TAL1 interrupting locus	-1.42	3.37e-05			STIL	SCL/TAL1 interrupting locus	-1.35254	8.64e-05
	STMN1	stathmin 1	-1.45	2.21e-06			STMN1	stathmin 1	-1.65	1.06e-06			STMN1	stathmin 1	-1.9	3.28e-07			STMN1	stathmin 1	-1.6202	5.14e-06
	SUSD2	sushi domain containing 2	2.29	4.97e-07			SUSD2	sushi domain containing 2	2	5.02e-06			SUSD2	sushi domain containing 2	2.22	5.59e-08			SUSD2	sushi domain containing 2	1.53608	0.000102
	SVEP1	sushi, von Willebrand factor type A, EGF and pentraxin domain containing 1	2.36	1.22e-06			SVEP1	sushi, von Willebrand factor type A, EGF and pentraxin domain containing 1	1.98	0.000149			SVEP1	sushi, von Willebrand factor type A, EGF and pentraxin domain containing 1	1.83	2.43e-06			SVEP1	sushi, von Willebrand factor type A, EGF and pentraxin domain containing 1	1.23391	0.00129
	TACC3	transforming acidic coiled-coil containing protein 3	-1.05	5.4e-06			TACC3	transforming acidic coiled-coil containing protein 3	-1.5	2.06e-07			TACC3	transforming acidic coiled-coil containing protein 3	-1.62	5.92e-08			TACC3	transforming acidic coiled-coil containing protein 3	-1.43086	4.93e-07
	TAGLN	transgelin	1.32	3.44e-05			TAGLN	transgelin	2.17	6.7e-06			TAGLN	transgelin	2.29	1.21e-06			TAGLN	transgelin	1.88494	8.57e-06
	TCEAL3	transcription elongation factor A like 3	1.46	1.16e-05			TCEAL3	transcription elongation factor A like 3	1.7	4.43e-06			TCEAL3	transcription elongation factor A like 3	1.86	7.54e-07			TCEAL3	transcription elongation factor A like 3	1.95812	7.97e-06
	TCEAL4	transcription elongation factor A like 4	1.69	2.37e-07			TCEAL4	transcription elongation factor A like 4	1.92	5.47e-08			TCEAL4	transcription elongation factor A like 4	2.28	1.46e-08			TCEAL4	transcription elongation factor A like 4	2.09209	2.24e-08
	TEX2	testis expressed 2	1.15	5.03e-05			TEX2	testis expressed 2	1.78	1.44e-06			TEX2	testis expressed 2	2.3	4.6e-07			TEX2	testis expressed 2	1.97117	7.56e-07
	TFPI2	tissue factor pathway inhibitor 2	-1.61	0.00226			TFPI2	tissue factor pathway inhibitor 2	-1.56	0.000284			TFPI2	tissue factor pathway inhibitor 2	-2.51	4.3e-06			TFPI2	tissue factor pathway inhibitor 2	-1.92628	1.76e-05
	TGFBI	transforming growth factor beta induced	-1.33	6.58e-07			TGFBI	transforming growth factor beta induced	-2.88	4.71e-07			TGFBI	transforming growth factor beta induced	-3.73	9.85e-09			TGFBI	transforming growth factor beta induced	-3.68667	5.07e-07
	THBS1	thrombospondin 1	1.26	0.00243			THBS1	thrombospondin 1	1.45	0.00198			THBS1	thrombospondin 1	1.43	0.00108			THBS1	thrombospondin 1	1.24589	0.00526
	TK1	thymidine kinase 1	-1.48	6.24e-05			TK1	thymidine kinase 1	-2.21	3.44e-06			TK1	thymidine kinase 1	-2.53	8.76e-07			TK1	thymidine kinase 1	-2.17137	1.24e-05
	TM4SF1	transmembrane 4 L six family member 1	-1.97	4.66e-07			TM4SF1	transmembrane 4 L six family member 1	-1.9	2.02e-05			TM4SF1	transmembrane 4 L six family member 1	-1.81	4.38e-07			TM4SF1	transmembrane 4 L six family member 1	-2.25869	2.61e-07
	TMEM119	transmembrane protein 119	2.39	2.37e-07			TMEM119	transmembrane protein 119	2.84	7.31e-07			TMEM119	transmembrane protein 119	2.92	3.75e-08			TMEM119	transmembrane protein 119	2.67293	4.96e-06
	TOP2A	topoisomerase (DNA) II alpha	-1.76	5.13e-05			TOP2A	topoisomerase (DNA) II alpha	-2.77	2.09e-06			TOP2A	topoisomerase (DNA) II alpha	-3.44	1.33e-07			TOP2A	topoisomerase (DNA) II alpha	-2.67993	1.02e-06
	TPX2	TPX2, microtubule nucleation factor	-1.17	3.68e-05			TPX2	TPX2, microtubule nucleation factor	-1.55	2.73e-06			TPX2	TPX2, microtubule nucleation factor	-1.66	1.04e-06			TPX2	TPX2, microtubule nucleation factor	-1.63324	2.57e-06
	TRIP13	thyroid hormone receptor interactor 13	-1.55	2.75e-06			TRIP13	thyroid hormone receptor interactor 13	-2.35	1.38e-07			TRIP13	thyroid hormone receptor interactor 13	-2.66	1.28e-08			TRIP13	thyroid hormone receptor interactor 13	-2.20081	3.15e-07
	TRMT5	tRNA methyltransferase 5	-1.34	2.98e-06			TRMT5	tRNA methyltransferase 5	-1.96	3.81e-07			TRMT5	tRNA methyltransferase 5	-1.88	8.33e-07			TRMT5	tRNA methyltransferase 5	-1.57793	9.16e-07
	TSC22D3	TSC22 domain family member 3	2.73	1.67e-06			TSC22D3	TSC22 domain family member 3	2.97	4.71e-07			TSC22D3	TSC22 domain family member 3	2.99	7.32e-08			TSC22D3	TSC22 domain family member 3	3.31894	2.99e-07
	TTK	TTK protein kinase	-1.15	0.000201			TTK	TTK protein kinase	-1.54	2.38e-05			TTK	TTK protein kinase	-1.67	8.04e-06			TTK	TTK protein kinase	-1.53003	3.33e-05
	TUBB3	tubulin beta 3 class III	-1.89	2.64e-05			TUBB3	tubulin beta 3 class III	-2.89	6.53e-07			TUBB3	tubulin beta 3 class III	-3.44	1.82e-07			TUBB3	tubulin beta 3 class III	-2.82221	2.16e-06
	TXNIP	thioredoxin interacting protein	1.66	6.58e-07			TXNIP	thioredoxin interacting protein	2.72	1.26e-07			TXNIP	thioredoxin interacting protein	3.23	2.96e-08			TXNIP	thioredoxin interacting protein	2.86003	2.51e-07
	TYMS	thymidylate synthetase	-1.52	0.000952			TYMS	thymidylate synthetase	-2.69	2.47e-05			TYMS	thymidylate synthetase	-3.66	1.59e-06			TYMS	thymidylate synthetase	-2.81326	3.53e-05
	UBE2C	ubiquitin conjugating enzyme E2 C	-1.97	2.33e-07			UBE2C	ubiquitin conjugating enzyme E2 C	-3.26	1.37e-08			UBE2C	ubiquitin conjugating enzyme E2 C	-3.75	3.73e-09			UBE2C	ubiquitin conjugating enzyme E2 C	-3.05419	8.74e-08
	UBE2T	ubiquitin conjugating enzyme E2 T	-1.47	2.23e-05			UBE2T	ubiquitin conjugating enzyme E2 T	-1.65	8.84e-06			UBE2T	ubiquitin conjugating enzyme E2 T	-1.65	4.1e-06			UBE2T	ubiquitin conjugating enzyme E2 T	-1.45854	2.03e-05
	UHRF1	ubiquitin like with PHD and ring finger domains 1	-1.73	1.3e-06			UHRF1	ubiquitin like with PHD and ring finger domains 1	-2.93	6.3e-08			UHRF1	ubiquitin like with PHD and ring finger domains 1	-3.29	1.13e-08			UHRF1	ubiquitin like with PHD and ring finger domains 1	-2.94878	8.23e-08
	VGLL3	vestigial like family member 3	1.17	3.71e-06			VGLL3	vestigial like family member 3	1.28	4.29e-06			VGLL3	vestigial like family member 3	1.22	4.66e-06			VGLL3	vestigial like family member 3	1.25773	5.58e-05
	WISP1	WNT1 inducible signaling pathway protein 1	1.69	3.19e-07			WISP1	WNT1 inducible signaling pathway protein 1	1.74	1.95e-06			WISP1	WNT1 inducible signaling pathway protein 1	1.38	4.48e-05			WISP1	WNT1 inducible signaling pathway protein 1	1.86649	3.3e-06
	ZBTB16	zinc finger and BTB domain containing 16	1.13	6.58e-07			ZBTB16	zinc finger and BTB domain containing 16	1.53	9.35e-08			ZBTB16	zinc finger and BTB domain containing 16	1.78	4.97e-08			ZBTB16	zinc finger and BTB domain containing 16	1.67983	2.53e-07
	ZNF106	zinc finger protein 106	1.19	7.97e-06			ZNF106	zinc finger protein 106	1.46	2.03e-07			ZNF106	zinc finger protein 106	1.47	9.34e-07			ZNF106	zinc finger protein 106	1.33785	1.13e-05
	ZWINT	ZW10 interacting kinetochore protein	-1.21	8.89e-06			ZWINT	ZW10 interacting kinetochore protein	-1.55	1.58e-06			ZWINT	ZW10 interacting kinetochore protein	-1.6	5.8e-07			ZWINT	ZW10 interacting kinetochore protein	-1.40258	1.34e-05
